# Supplementary material
Source: publisher figshare collection journal article supplement (https://sage.figshare.com/ndownloader/files/15352670)
Supplement: Supplementary file 1 [file 15352670]

## **Supplementary Appendix 1**

### **Detailed description of the screening procedure**

On December 2015 the first author (FA) and second author (SA) performed a systematic literature search by using three popular databases in psychology and related disciplines: Web of Science (WoS), PsycINFO (PI), and PubMed (PM). We limited our search to the previous five full years, that is, from January 1<sup>st</sup>, 2010, to December 31<sup>st</sup>, 2014. We based the search on two groups of terms, one for the statistical model and the other for the substantive field of application. All (statistical and substantive) terms were searched anywhere in the text (e.g., title, abstract, body text). We required that the records returned from the search be journal articles, book chapters, or books, written in English. The aim of the literature search was to evaluate current practice of substantive researchers in non-pathological cognitive aging, who analyzed longitudinal data with some form of growth model. Thus, we excluded hits that were statistical/methodological in nature (that were tutorials, or that focused on studying properties of such models).

Terms concerning the statistical model were: “growth curve model\*”; “latent curve model\*”; “multilevel model\*”; “mixed effects model\*”; “linear mixed model\*”; “random effects model\*”; “hierarchical linear model\*”; “nonlinear hierarchical model\*”; “generalized linear mixed model\*”; “nonlinear mixed model\*”. We included the wildcard “\*” to include variations (such as modeling, modelling, models, etc.). Growth curve and latent curve models are by definition applied to longitudinal data, whereas those within the multilevel family can also be applied to cross-sectional data (e.g., typically hierarchically organized data, such as children within schools) or to meta-analyses (to account for both across-studies and within-study

variations). Thus, for this latter class of models we added the “longitudinal” term. The terms concerning the statistical model were combined with two terms concerning the substantive application: “intelligence” and “cogniti\*”. We again included the wild card “\*” to assure coverage of related terms such as cognition, cognitive, cognitively, etc. We refrained from searching for specific cognitive abilities (e.g., speed, episodic or working memory, inhibition), because of the very large number of terms that such a search would have required. Moreover, we reasoned that scientific writings focused on specific abilities are very likely to include the terms “intelligence” and/or “cogniti\*” in their text.

The supplemental Table 1 shows the number of records from each literature database for each combined use of statistical and substantive search terms. The last column shows the sum across the three databases. The row named Sum shows the total number of records across all search terms from each database: 593 for WoS, 571 for PI, and 89 for PM, for a total of 1253 records. First, the FA and SA independently eliminated first all duplicate records within each database and for this first step obtained full agreement. The resulting numbers of retained records were 536 for WoS, 493 for PI, and 82 for PM, for a total of 1111 records. Then, FA and SA independently eliminated duplicate and non-English records across databases, and obtained a final number of 719 entries, again with full agreement. Duplicates were established based on authors’ names, title and date of record, and name of publication.

Second, FA and SA independently read the abstracts of 182 records (a fourth) to screen them for eligibility, according to the criteria listed below. That is, despite the inclusion of the search terms, a record could be unrelated to the aims of the search (in few cases the abstract was not sufficient and portions of the text had to be read). At this stage, the FA and SA had a 0.73

agreement index. Thus, the FA and SA together analyzed, discussed, and reclassified the discordant records to reach full consensus.

Third, the FA and SA independently read and classified the abstracts of the remaining (719 – 182 =) 537 records. At this stage, the FA and SA had a 0.88 agreement index. They again reclassified the discordant records to reach full consensus. In the end, of the 719 records, the following were excluded:

- n=4, because they were commentary articles (n=2), reviews (n=1), or corrections (n=1);
- n=1, because it was a conference poster and only the abstract was available;
- n=20, because they were meta-analyses;
- n=7, because they did not include longitudinal/repeated measurement data (e.g., mixed-effects models were used on cross-sectional data with heterogeneous variances across conditions, or with siblings or neighborhoods as clusters);
- n=48, because they were of statistical or methodological nature <sup>1</sup>;

---

<sup>1</sup> i.e., that appeared in specialized journals (The American Statistician; Annals of Applied Statistics; Applied Psychological Measurement; Behavior research methods; Biometrical Journal; Biometrika; British Journal of Mathematical and Statistical Psychology; Computational Statistics and Data Analysis; Frontiers in Psychology; Quantitative Psychology and Measurement; Journal of the American Statistical Association; Journal of Applied Statistics; Journal of Biometrics and Biostatistics; Journal of Computational and Graphical Statistics; Journal of Educational and Behavioral Statistics; Journal of the Royal Statistical Society, Series A, Statistics in Society; Journal of the Royal Statistical Society, Series C, Applied Statistics; Methodology; Multivariate Behavioral Research; Psychological Methods; Psychometrika; Statistical Methods in Medical Research; Statistical Modelling; Statistics in Medicine; Structural Equation Modeling; Statistical Methodology), that appeared in substantive journals but that focused on methodological/statistical issues (American Journal of Epidemiology; The American Journal of Geriatric Psychiatry; Annals of Epidemiology; Contemporary Clinical Trials; European Journal of Developmental Psychology; Journal of Cognition and Development; Neuroepidemiology; NeuroImage; Psychology and Aging; Sleep Medicine; World Journal of Biological Psychiatry), or that appeared in methodological or statistical books (e.g., Contemporary issues in exploratory data mining in the behavioral sciences; Handbook for advanced multilevel analysis; The handbook of life-span development; Handbook of structural equation modeling; Longitudinal data analysis: A practical guide for researchers in aging, health, and social sciences; Quantitative and qualitative methods in psychotherapy research).

- n=128, because they included and focused on non-normal samples (e.g., patients with Alzheimer, Parkinson, autism, depression, bipolar disorders, breast cancer, MCI, heavy drinkers);
- n=243 did not include samples of elderly individuals (age < 65 years);
- n=349 did not specify cognitive or intelligence performance as dependent variable of analysis (e.g., controlled for cognitive variables but specified non-cognitive dependent variables, or discussed relevance of findings in terms of general cognitive functioning, without explicit assessment or analysis of cognitive variables).

Many records met multiple exclusion criteria (e.g., n=149 did not include samples of elderly individuals and did not specify cognitive or intelligence performance as dependent variable of analysis; n=70 included non-normal samples and did not specify cognitive or intelligence performance as dependent variable of analysis). In the end, we retained and fully analyzed n=162 records. The screening procedure is represented in the Supplemental Figure 1.

## Supplementary Appendix 2

### Records in final analysis based on the literature review

- Abner, E. L., Dennis, B. C., Mathews, M. J., Mendiondo, M. S., Caban-Holt, A., Kryscio, R. J., ... Crowley, J. J. (2012). Practice effects in a longitudinal, multi-center Alzheimer's disease prevention clinical trial. *Trials*, 13, 217. <https://doi.org/10.1186/1745-6215-13-217>
- Ahles, T. A., Saykin, A. J., McDonald, B. C., Li, Y., Furstenberg, C. T., Hanscom, B. S., ... Kaufman, P. A. (2010). Longitudinal assessment of cognitive changes associated with adjuvant treatment for breast cancer: impact of age and cognitive reserve. *Journal of Clinical Oncology: Official Journal of the American Society of Clinical Oncology*, 28(29), 4434–4440. <https://doi.org/10.1200/JCO.2009.27.0827>
- Aichberger, M. C., Busch, M. A., Reischies, F. M., Ströhle, A., Heinz, A., & Rapp, M. A. (2010). Effect of physical inactivity on cognitive performance after 2.5 years of follow-up: Longitudinal results from the Survey of Health, Ageing, and Retirement (SHARE). *GeroPsych: The Journal of Gerontopsychology and Geriatric Psychiatry*, 23(1), 7–15. <https://doi.org/10.1024/1662-9647/a0000003>
- Allerhand, M., Gale, C. R., & Deary, I. J. (2014). The dynamic relationship between cognitive function and positive well-being in older people: A prospective study using the English Longitudinal Study of Aging. *Psychology and Aging*, 29(2), 306–318. <https://doi.org/10.1037/a0036551>
- Alwerdt, J., Edwards, J. D., Athilingam, P., O'Connor, M. L., & Valdés, E. G. (2013). Longitudinal differences in cognitive functioning among older adults with and without

heart failure. *Journal of Aging and Health*, 25(8), 1358–1377.

<https://doi.org/10.1177/0898264313505111>

Andersson-Roswall, L., Engman, E., Samuelsson, H., & Malmgren, K. (2010). Cognitive outcome 10 years after temporal lobe epilepsy surgery: A prospective controlled study.

*Neurology*, 74(24), 1977–1985. <https://doi.org/10.1212/WNL.0b013e3181e39684>

Arab, L., Biggs, M. L., O'Meara, E. S., Longstreth, W. T., Crane, P. K., & Fitzpatrick, A. L.

(2011). Gender differences in tea, coffee, and cognitive decline in the elderly: the Cardiovascular Health Study. *Journal of Alzheimer's Disease: JAD*, 27(3), 553–566.

<https://doi.org/10.3233/JAD-2011-110431>

Ball, K. K., Ross, L. A., Roth, D. L., & Edwards, J. D. (2013). Speed of processing training in the ACTIVE study: how much is needed and who benefits? *Journal of Aging and Health*,

25(8 Suppl), 65S-84S. <https://doi.org/10.1177/0898264312470167>

Barnes, L. L., Wilson, R. S., Everson-Rose, S. A., Hayward, M. D., Evans, D. A., & de Leon, C.

F. M. (2012). Effects of early-life adversity on cognitive decline in older African Americans and whites. *Neurology*, 79(24), 2321–2327.

<https://doi.org/10.1212/WNL.0b013e318278b607>

Benke, K. S., Carlson, M. C., Doan, B. Q., Walston, J. D., Xue, Q. L., Reiner, A. P., ... Fallin,

M. D. (2011). The association of genetic variants in interleukin-1 genes with cognition: findings from the cardiovascular health study. *Experimental Gerontology*, 46(12), 1010–

1019. <https://doi.org/10.1016/j.exger.2011.09.005>

Beydoun, M. A., Ding, E. L., Beydoun, H. A., Tanaka, T., Ferrucci, L., & Zonderman, A. B.

(2012). Vitamin D receptor and megalin gene polymorphisms and their associations with

- longitudinal cognitive change in US adults. *The American Journal of Clinical Nutrition*, 95(1), 163–178. <https://doi.org/10.3945/ajcn.111.017137>
- Bielak, A. A. M., Anstey, K. J., Christensen, H., & Windsor, T. D. (2012). Activity engagement is related to level, but not change in cognitive ability across adulthood. *Psychology and Aging*, 27(1), 219–228. <https://doi.org/10.1037/a0024667>
- Bielak, A. A. M., Cherbuin, N., Bunce, D., & Anstey, K. J. (2014). Intraindividual variability is a fundamental phenomenon of aging: Evidence from an 8-year longitudinal study across young, middle, and older adulthood. *Developmental Psychology*, 50(1), 143–151. <https://doi.org/10.1037/a0032650>
- Bielak, A. A. M., Cherbuin, N., Bunce, D., & Anstey, K. J. (2014). Preserved differentiation between physical activity and cognitive performance across young, middle, and older adulthood over 8 years. *The Journals of Gerontology. Series B, Psychological Sciences and Social Sciences*, 69(4), 523–532. <https://doi.org/10.1093/geronb/gbu016>
- Bielak, A. A. M., Gerstorf, D., Anstey, K. J., & Luszcz, M. A. (2014). Longitudinal associations between activity and cognition vary by age, activity type, and cognitive domain. *Psychology and Aging*, 29(4), 863–872. <https://doi.org/10.1037/a0036960>
- Bindawas, S. M., Graham, J. E., Karmarkar, A. M., Chen, N.-W., Granger, C. V., Niewczyk, P., ... Ottenbacher, K. J. (2014). Trajectories in functional recovery for patients receiving inpatient rehabilitation for unilateral hip or knee replacement. *Archives of Gerontology and Geriatrics*, 58(3), 344–349. <https://doi.org/10.1016/j.archger.2013.12.009>
- Blackwell, T., Yaffe, K., Laffan, A., Ancoli-Israel, S., Redline, S., Ensrud, K. E., ... Osteoporotic Fractures in Men (MrOS) Study Group. (2014). Associations of objectively and subjectively measured sleep quality with subsequent cognitive decline in older

community-dwelling men: the MrOS sleep study. *Sleep*, 37(4), 655–663.

<https://doi.org/10.5665/sleep.3562>

Brown, M. T., Wilmoth, J. M., & London, A. S. (2014). Veteran status and men's later-life cognitive trajectories: evidence from the health and retirement study. *Journal of Aging and Health*, 26(6), 924–951. <https://doi.org/10.1177/0898264314534893>

Buchman, A. S., Boyle, P. A., Leurgans, S. E., Barnes, L. L., & Bennett, D. A. (2011). Cognitive function is associated with the development of mobility impairments in community-dwelling elders. *The American Journal of Geriatric Psychiatry*, 19(6), 571–580.

<https://doi.org/10.1097/JGP.0b013e3181ef7a2e>

Buchman, A. S., Yu, L., Wilson, R. S., Shulman, J. M., Boyle, P. A., & Bennett, D. A. (2014). Harm avoidance is associated with progression of parkinsonism in community-dwelling older adults: a prospective cohort study. *BMC Geriatrics*, 14, 54.

<https://doi.org/10.1186/1471-2318-14-54>

Buracchio, T., Dodge, H. H., Howieson, D., Wasserman, D., & Kaye, J. (2010). The trajectory of gait speed preceding mild cognitive impairment. *Archives of Neurology*, 67(8), 980–986.

<https://doi.org/10.1001/archneurol.2010.159>

Bürki, C. N., Ludwig, C., Chicherio, C., & de Ribaupierre, A. (2014). Individual differences in cognitive plasticity: An investigation of training curves in younger and older adults.

*Psychological Research*, 78(6), 821–835. <https://doi.org/10.1007/s00426-014-0559-3>

Chiang, G. C., Insel, P. S., Tosun, D., Schuff, N., Truran-Sacrey, D., Raptentsetsang, S. T., ...

Weiner, M. W. (2010). Hippocampal atrophy rates and CSF biomarkers in elderly APOE2 normal subjects. *Neurology*, 75(22), 1976–1981.

<https://doi.org/10.1212/WNL.0b013e3181ffe4d1>



- Chiao, C., Botticello, A., & Fuh, J.-L. (2014). Life-course socio-economic disadvantage and late-life cognitive functioning in Taiwan: results from a national cohort study. *International Health*, 6(4), 322–330. <https://doi.org/10.1093/inthealth/ihu046>
- Choi, M., Lohman, M. C., & Mezuk, B. (2014). Trajectories of cognitive decline by driving mobility: evidence from the Health and Retirement Study. *International Journal of Geriatric Psychiatry*, 29(5), 447–453. <https://doi.org/10.1002/gps.4024>
- Collins, B., MacKenzie, J., Tasca, G. A., Scherling, C., & Smith, A. (2013). Cognitive effects of chemotherapy in breast cancer patients: A dose–response study. *Psycho-Oncology*, 22(7), 1517–1527. <https://doi.org/10.1002/pon.3163>
- Comijs, H. C., van den Kommer, T. N., Minnaar, R. W. M., Penninx, B. W. J. H., & Deeg, D. J. H. (2011). Accumulated and differential effects of life events on cognitive decline in older persons: Depending on depression, baseline cognition, or ApoE ε4 status? *The Journals of Gerontology: Series B: Psychological Sciences and Social Sciences*, 66B(Supp 1), 111–120. <https://doi.org/10.1093/geronb/gbr019>
- Crane, P. K., Gruhl, J. C., Erosheva, E. A., Gibbons, L. E., McCurry, S. M., Rhoads, K., ... White, L. (2010). Use of spoken and written Japanese did not protect Japanese-American men from cognitive decline in late life. *The Journals of Gerontology. Series B, Psychological Sciences and Social Sciences*, 65(6), 654–666. <https://doi.org/10.1093/geronb/gbq046>
- Dahl, A. K., Hassing, L. B., Fransson, E. I., Gatz, M., Reynolds, C. A., & Pedersen, N. L. (2013). Body mass index across midlife and cognitive change in late life. *International Journal of Obesity*, 37(2), 296–302. <https://doi.org/10.1038/ijo.2012.37>

- Dahl, A., Hassing, L. B., Fransson, E., Berg, S., Gatz, M., Reynolds, C. A., & Pedersen, N. L. (2010). Being overweight in midlife is associated with lower cognitive ability and steeper cognitive decline in late life. *The Journals of Gerontology: Series A: Biological Sciences and Medical Sciences*, 65A(1), 57–62. <https://doi.org/10.1093/gerona/glp035>
- Daly, M., McMinn, D., & Allan, J. L. (2015). A bidirectional relationship between physical activity and executive function in older adults. *Frontiers in Human Neuroscience*, 8. <https://doi.org/10.3389/fnhum.2014.01044>
- Danhauer, S. C., Legault, C., Bandos, H., Kidwell, K., Costantino, J., Vaughan, L., ... Shumaker, S. (2013). Positive and negative affect, depression, and cognitive processes in the Cognition in the Study of Tamoxifen and Raloxifene (Co-STAR) Trial. *Neuropsychology, Development, and Cognition. Section B, Aging, Neuropsychology and Cognition*, 20(5), 532–552. <https://doi.org/10.1080/13825585.2012.747671>
- Danthiir, V., Burns, N. R., Nettelbeck, T., Wilson, C., & Wittert, G. (2011). The older people, omega-3, and cognitive health (EPOCH) trial design and methodology: a randomised, double-blind, controlled trial investigating the effect of long-chain omega-3 fatty acids on cognitive ageing and wellbeing in cognitively healthy older adults. *Nutrition Journal*, 10, 117. <https://doi.org/10.1186/1475-2891-10-117>
- Das, D., Tan, X., Bielak, A. A. M., Cherbuin, N., Easteal, S., & Anstey, K. J. (2014). Cognitive ability, intraindividual variability, and common genetic variants of catechol-O-methyltransferase and brain-derived neurotrophic factor: a longitudinal study in a population-based sample of older adults. *Psychology and Aging*, 29(2), 393–403. <https://doi.org/10.1037/a0035702>

Deary, I. J., Johnson, W., Gow, A. J., Pattie, A., Brett, C. E., Bates, T. C., & Starr, J. M. (2011).

Losing one's grip: A bivariate growth curve model of grip strength and nonverbal reasoning from age 79 to 87 years in the Lothian birth cohort 1921. *The Journals of Gerontology: Series B: Psychological Sciences and Social Sciences*, 66B(6), 699–707.

<https://doi.org/10.1093/geronb/gbr059>

de Frias, C. M., Schaie, K. W., & Willis, S. L. (2014). Hypertension moderates the effect of APOE on 21-year cognitive trajectories. *Psychology and Aging*, 29(2), 431–439.

<https://doi.org/10.1037/a0036828>

Desikan, R. S., McEvoy, L. K., Thompson, W. K., Holland, D., Roddey, J. C., Blennow, K., ...

Dale, A. M. (2011). Amyloid- $\beta$  associated volume loss occurs only in the presence of phospho-tau. *Annals of Neurology*, 70(4), 657–661. <https://doi.org/10.1002/ana.22509>

Desikan, R. S., McEvoy, L. K., Holland, D., Thompson, W. K., Brewer, J. B., Aisen, P. S., ...

Alzheimer's Disease Neuroimaging Initiative. (2013). Apolipoprotein E epsilon4 does not modulate amyloid- $\beta$ -associated neurodegeneration in preclinical Alzheimer disease. *AJNR. American Journal of Neuroradiology*, 34(3), 505–510. <https://doi.org/10.3174/ajnr.A3267>

Desplenter, F., Lavikainen, P., Hartikainen, S., Sulkava, R., & Bell, J. S. (2012). Sedative use and incident cognitive decline among persons aged 75 years and older: a population-based longitudinal study. *International Psychogeriatrics*, 24(1), 48–54.

<https://doi.org/10.1017/S1041610211001359>

Dodge, H. H., Wang, C.-N., Chang, C.-C. H., & Ganguli, M. (2011). Terminal decline and practice effects in older adults without dementia: The MoVIES project. *Neurology*, 77(8), 722–730. <https://doi.org/10.1212/WNL.0b013e31822b0068>

- Dodonov, Y. S., & Dodonova, Y. A. (2012). Response time analysis in cognitive tasks with increasing difficulty. *Intelligence*, 40(5), 379–394.  
<https://doi.org/10.1016/j.intell.2012.07.002>
- Dowling, N. M., Johnson, S. C., Gleason, C. E., Jagust, W. J., & Alzheimer's Disease Neuroimaging Initiative. (2015). The mediational effects of FDG hypometabolism on the association between cerebrospinal fluid biomarkers and neurocognitive function. *NeuroImage*, 105, 357–368. <https://doi.org/10.1016/j.neuroimage.2014.10.050>
- Duits, F. H., Kester, M. I., Scheffer, P. G., Blankenstein, M. A., Scheltens, P., Teunissen, C. E., & van der Flier, W. M. (2013). Increase in cerebrospinal fluid F2-isoprostanes is related to cognitive decline in APOE  $\epsilon$ 4 carriers. *Journal of Alzheimer's Disease: JAD*, 36(3), 563–570. <https://doi.org/10.3233/JAD-122227>
- Dzierzewski, J. M., Fung, C. H., Jouldjian, S., Alessi, C. A., Irwin, M. R., & Martin, J. L. (2014). Decrease in daytime sleeping is associated with improvement in cognition after hospital discharge in older adults. *Journal of the American Geriatrics Society*, 62(1), 47–53.
- Ellis, K. A., Lim, Y. Y., Harrington, K., Ames, D., Bush, A. I., Darby, D., ... AIBL Research Group. (2013). Decline in cognitive function over 18 months in healthy older adults with high amyloid- $\beta$ . *Journal of Alzheimer's Disease: JAD*, 34(4), 861–871.  
<https://doi.org/10.3233/JAD-122170>
- Ellwardt, L., Aartsen, M., Deeg, D., & Steverink, N. (2013). Does loneliness mediate the relation between social support and cognitive functioning in later life? *Social Science & Medicine*, 98, 116–124. <https://doi.org/10.1016/j.socscimed.2013.09.002>
- Emanuel, J. E., Lopez, O. L., Houck, P. R., Becker, J. T., Weamer, E. A., Demichele-Sweet, M. A. A., ... Sweet, R. A. (2011). Trajectory of cognitive decline as a predictor of psychosis

in early Alzheimer disease in the cardiovascular health study. *The American Journal of Geriatric Psychiatry: Official Journal of the American Association for Geriatric Psychiatry*, 19(2), 160–168. <https://doi.org/10.1097/JGP.0b013e3181e446c8>

Engelman, C. D., Kosciak, R. L., Jonaitis, E. M., Okonkwo, O. C., Hermann, B. P., La Rue, A., & Sager, M. A. (2013). Interaction between two cholesterol metabolism genes influences memory: findings from the Wisconsin Registry for Alzheimer’s Prevention. *Journal of Alzheimer’s Disease: JAD*, 36(4), 749–757. <https://doi.org/10.3233/JAD-130482>

Eramudugolla, R., Bielak, A. A. M., Bunce, D., Eastaak, S., Cherbuin, N., & Anstey, K. J. (2014). Long-term cognitive correlates of traumatic brain injury across adulthood and interactions with APOE genotype, sex, and age cohorts. *Journal of the International Neuropsychological Society*, 20(4), 444–454. <https://doi.org/10.1017/S1355617714000174>

Farias, S. T., Chand, V., Bonnici, L., Baynes, K., Harvey, D., Mungas, D., ... Reed, B. (2012). Idea density measured in late life predicts subsequent cognitive trajectories: implications for the measurement of cognitive reserve. *The Journals of Gerontology. Series B, Psychological Sciences and Social Sciences*, 67(6), 677–686. <https://doi.org/10.1093/geronb/gbr162>

Farias, S. T., Mungas, D., Hinton, L., & Haan, M. (2011). Demographic, neuropsychological, and functional predictors of rate of longitudinal cognitive decline in Hispanic older adults. *The American Journal of Geriatric Psychiatry*, 19(5), 440–450. <https://doi.org/10.1097/JGP.0b013e3181e9b9a5>

Feng, L., Li, J., Ng, T.-P., Lee, T.-S., Kua, E.-H., & Zeng, Y. (2012). Tea drinking and cognitive function in oldest-old Chinese. *The Journal of Nutrition, Health & Aging*, 16(9), 754–758. <https://doi.org/10.1007/s12603-012-0077-1>

- Ferguson, A., Spencer, E., Craig, H., & Colyvas, K. (2014). Propositional idea density in women's written language over the lifespan: computerized analysis. *Cortex; a Journal Devoted to the Study of the Nervous System and Behavior*, 55, 107–121.  
<https://doi.org/10.1016/j.cortex.2013.05.012>
- Finkel, D., Reynolds, C. A., Larsson, M., Gatz, M., & Pedersen, N. L. (2011). Both odor identification and ApoE-ε4 contribute to normative cognitive aging. *Psychology and Aging*, 26(4), 872–883. <https://doi.org/10.1037/a0023371>
- Fiocco, A. J., Lindquist, K., Ferrell, R., Li, R., Simonsick, E. M., Nalls, M., ... Yaffe, K. (2010). COMT genotype and cognitive function: An 8-year longitudinal study in white and black elders. *Neurology*, 74(16), 1296–1302. <https://doi.org/10.1212/WNL.0b013e3181d9edba>
- Frazier, D. T., Seider, T., Bettcher, B. M., Mack, W. J., Jastrzab, L., Chao, L., ... Kramer, J. H. (2014). The role of carotid intima-media thickness in predicting longitudinal cognitive function in an older adult cohort. *Cerebrovascular Diseases (Basel, Switzerland)*, 38(6), 441–447. <https://doi.org/10.1159/000366469>
- Gale, C. R., Allerhand, M., Sayer, A. A., Cooper, C., & Deary, I. J. (2014). The dynamic relationship between cognitive function and walking speed: the English Longitudinal Study of Ageing. *Age (Dordrecht, Netherlands)*, 36(4), 9682. <https://doi.org/10.1007/s11357-014-9682-8>
- Ganguli, M., Fu, B., Snitz, B. E., Unverzagt, F. W., Loewenstein, D. A., Hughes, T. F., & Chang, C.-C. H. (2014). Vascular risk factors and cognitive decline in a population sample. *Alzheimer Disease and Associated Disorders*, 28(1), 9–15.  
<https://doi.org/10.1097/WAD.0000000000000004>

Gerritsen, L., Comijs, H. C., Deeg, D. J. H., Penninx, B. W. J. H., & Geerlings, M. I. (2011).

Salivary cortisol, APOE- $\epsilon$ 4 allele and cognitive decline in a prospective study of older persons. *Neurobiology of Aging*, 32(9), 1615–1625.

<https://doi.org/10.1016/j.neurobiolaging.2009.09.007>

Ghisletta, P., Kennedy, K. M., Rodrigue, K. M., Lindenberger, U., & Raz, N. (2010). Adult age

differences and the role of cognitive resources in perceptual-motor skill acquisition: application of a multilevel negative exponential model. *The Journals of Gerontology. Series B, Psychological Sciences and Social Sciences*, 65B(2), 163–173.

*Series B, Psychological Sciences and Social Sciences*, 65B(2), 163–173.

<https://doi.org/10.1093/geronb/gbp126>

Ghisletta, P., Rabbitt, P., Lunn, M., & Lindenberger, U. (2012). Two thirds of the age-based

changes in fluid and crystallized intelligence, perceptual speed, and memory in adulthood are shared. *Intelligence*, 40(3), 260–268. <https://doi.org/10.1016/j.intell.2012.02.008>

Goldhammer, F., Rauch, W. A., Schweizer, K., & Moosbrugger, H. (2010). Differential effects

of intelligence, perceptual speed and age on growth in attentional speed and accuracy.

*Intelligence*, 38(1), 83–92. <https://doi.org/10.1016/j.intell.2009.07.002>

Gooding, L. F., Abner, E. L., Jicha, G. A., Kryscio, R. J., & Schmitt, F. A. (2014). Musical

Training and Late-Life Cognition. *American Journal of Alzheimer's Disease and Other*

*Dementias*, 29(4), 333–343. <https://doi.org/10.1177/1533317513517048>

Gow, A. J., Avlund, K., & Mortensen, E. L. (2014). Leisure activity associated with cognitive

ability level, but not cognitive change. *Frontiers in Psychology*, 5.

<https://doi.org/10.3389/fpsyg.2014.01176>

- Gow, A. J., Avlund, K., & Mortensen, E. L. (2014). Occupational characteristics and cognitive aging in the Glostrup 1914 Cohort. *The Journals of Gerontology. Series B, Psychological Sciences and Social Sciences*, 69(2), 228–236. <https://doi.org/10.1093/geronb/gbs115>
- Gow, A. J., Johnson, W., Mishra, G., Richards, M., Kuh, D., & Deary, I. J. (2012). Is age kinder to the initially more able?: Yes, and no. *Intelligence*, 40(1), 49–59. <https://doi.org/10.1016/j.intell.2011.10.007>
- Gow, A. J., Mortensen, E. L., & Avlund, K. (2012). Activity participation and cognitive aging from age 50 to 80 in the Glostrup 1914 Cohort. *Journal of the American Geriatrics Society*, 60(10), 1831–1838. <https://doi.org/10.1111/j.1532-5415.2012.04168.x>
- Greene, D., Tschanz, J. T., Smith, K. R., Ostbye, T., Corcoran, C., Welsh-Bohmer, K. A., ... Cache County Investigators. (2014). Impact of offspring death on cognitive health in late life: the Cache County study. *The American Journal of Geriatric Psychiatry*, 22(11), 1307–1315. <https://doi.org/10.1016/j.jagp.2013.05.002>
- Gross, A. L., Rebok, G. W., Unverzagt, F. W., Willis, S. L., & Brandt, J. (2011). Word list memory predicts everyday function and problem-solving in the elderly: results from the ACTIVE cognitive intervention trial. *Neuropsychology, Development, and Cognition. Section B, Aging, Neuropsychology and Cognition*, 18(2), 129–146. <https://doi.org/10.1080/13825585.2010.516814>
- Gurgel, R. K., Ward, P. D., Schwartz, S., Norton, M. C., Foster, N. L., & Tschanz, J. T. (2014). Relationship of hearing loss and dementia: a prospective, population-based study. *Otology & Neurotology: Official Publication of the American Otological Society, American Neurotology Society [and] European Academy of Otology and Neurotology*, 35(5), 775–781. <https://doi.org/10.1097/MAO.0000000000000313>



- Harvey, P. D., Reichenberg, A., Bowie, C. R., Patterson, T. L., & Heaton, R. K. (2010). The course of neuropsychological performance and functional capacity in older patients with schizophrenia: Influences of previous history of long-term institutional stay. *Biological Psychiatry*, 67(10), 933–939. <https://doi.org/10.1016/j.biopsych.2010.01.008>
- Hassing, L. B., Dahl, A. K., Pedersen, N. L., & Johansson, B. (2010). Overweight in midlife is related to lower cognitive function 30 years later: A prospective study with longitudinal assessments. *Dementia and Geriatric Cognitive Disorders*, 29(6), 543–552. <https://doi.org/10.1159/000314874>
- Hayden, K. M., Reed, B. R., Manly, J. J., Tommet, D., Pietrzak, R. H., Chelune, G. J., ... Jones, R. N. (2011). Cognitive decline in the elderly: an analysis of population heterogeneity. *Age and Ageing*, 40(6), 684–689. <https://doi.org/10.1093/ageing/afr101>
- Hendrie, H. C., Murrell, J., Baiyewu, O., Lane, K. A., Purnell, C., Ogunniyi, A., ... Gao, S. (2014). APOE  $\epsilon$ 4 and the risk for Alzheimer disease and cognitive decline in African Americans and Yoruba. *International Psychogeriatrics*, 26(6), 977–985. <https://doi.org/10.1017/S1041610214000167>
- Hess, T. M., Emery, L., & Neupert, S. D. (2012). Longitudinal relationships between resources, motivation and functioning. *The Journals of Gerontology: Series B: Psychological Sciences and Social Sciences*, 67B(3), 299–308. <https://doi.org/10.1093/geronb/gbr100>
- Hill, T. D., Angel, J. L., Balistreri, K. S., & Herrera, A. P. (2012). Immigrant status and cognitive functioning in late-life: An examination of gender variations in the healthy immigrant effect. *Social Science & Medicine*, 75(12), 2076–2084. <https://doi.org/10.1016/j.socscimed.2012.04.005>

Hjelm, C., Dahl, A., Broström, A., Mårtensson, J., Johansson, B., & Strömberg, A. (2012). The influence of heart failure on longitudinal changes in cognition among individuals 80 years of age and older. *Journal of Clinical Nursing*, 21(7–8), 994–1003.

<https://doi.org/10.1111/j.1365-2702.2011.03817.x>

Holtzer, R., Wang, C., Lipton, R., & Verghese, J. (2012). The protective effects of executive functions and episodic memory on gait speed decline in aging defined in the context of cognitive reserve. *Journal of the American Geriatrics Society*, 60(11), 2093–2098.

<https://doi.org/10.1111/j.1532-5415.2012.04193.x>

Hülür, G., Hertzog, C., Pearman, A., Ram, N., & Gerstorf, D. (2014). Longitudinal associations of subjective memory with memory performance and depressive symptoms: Between-person and within-person perspectives. *Psychology and Aging*, 29(4), 814–827.

<https://doi.org/10.1037/a0037619>

Jokinen, H., Lipsanen, J., Schmidt, R., Fazekas, F., Gouw, A. A., van der Flier, W. M., ...

LADIS Study Group. (2012). Brain atrophy accelerates cognitive decline in cerebral small vessel disease: the LADIS study. *Neurology*, 78(22), 1785–1792.

<https://doi.org/10.1212/WNL.0b013e3182583070>

Jokinen, H., Schmidt, R., Ropele, S., Fazekas, F., Gouw, A. A., Barkhof, F., ... LADIS Study Group. (2013). Diffusion changes predict cognitive and functional outcome: the LADIS study. *Annals of Neurology*, 73(5), 576–583. <https://doi.org/10.1002/ana.23802>

Jones, R. N., Marsiske, M., Ball, K., Rebok, G., Willis, S. L., Morris, J. N., & Tennstedt, S. L. (2013). The ACTIVE Cognitive Training Interventions and Trajectories of Performance among Older Adults. *Journal of Aging and Health*, 25(0).

<https://doi.org/10.1177/0898264312461938>

- Kaffashian, S., Dugravot, A., Brunner, E. J., Sabia, S., Ankri, J., Kivimäki, M., & Singh-Manoux, A. (2013). Midlife stroke risk and cognitive decline: a 10-year follow-up of the Whitehall II cohort study. *Alzheimer's & Dementia: The Journal of the Alzheimer's Association*, 9(5), 572–579. <https://doi.org/10.1016/j.jalz.2012.07.001>
- Köhler, S., van Boxtel, M. P. J., van Os, J., Thomas, A. J., O'Brien, J. T., Jolles, J., ... Allardyce, J. (2010). Depressive symptoms and cognitive decline in community-dwelling older adults. *Journal of the American Geriatrics Society*, 58(5), 873–879. <https://doi.org/10.1111/j.1532-5415.2010.02807.x>
- Laughlin, G. A., McEvoy, L. K., von Mühlen, D., Daniels, L. B., Kritz-Silverstein, D., Bergstrom, J., ... Barrett-Connor, E. (2011). Sex differences in the association of Framingham Cardiac Risk Score with cognitive decline in community-dwelling elders without clinical heart disease. *Psychosomatic Medicine*, 73(8), 683–689. <https://doi.org/10.1097/PSY.0b013e31822f9089>
- Laukka, E. J., Macdonald, S. W. S., Fratiglioni, L., & Bäckman, L. (2012). Preclinical cognitive trajectories differ for Alzheimer's disease and vascular dementia. *Journal of the International Neuropsychological Society: JINS*, 18(2), 191–199. <https://doi.org/10.1017/S1355617711001718>
- Leist, A. K., Glymour, M. M., Mackenbach, J. P., van Lenthe, F. J., & Avendano, M. (2013). Time away from work predicts later cognitive function: differences by activity during leave. *Annals of Epidemiology*, 23(8), 455–462. <https://doi.org/10.1016/j.annepidem.2013.05.014>
- Lim, Y. Y., Ellis, K. A., Pietrzak, R. H., Ames, D., Darby, D., Harrington, K., ... AIBL Research Group. (2012). Stronger effect of amyloid load than APOE genotype on cognitive decline

in healthy older adults. *Neurology*, 79(16), 1645–1652.

<https://doi.org/10.1212/WNL.0b013e31826e9ae6>

Liu, H., Gao, S., Hall, K. S., Unverzagt, F. W., Lane, K. A., Callahan, C. M., & Hendrie, H. C. (2013). Optimal blood pressure for cognitive function: Findings from an elderly African-American cohort study. *Journal of the American Geriatrics Society*, 61(6), 875–881.

<https://doi.org/10.1111/jgs.12259>

Luchsinger, J. A., Biggs, M. L., Kizer, J. R., Barzilay, J., Fitzpatrick, A., Newman, A., ... Kuller, L. (2013). Adiposity and cognitive decline in the cardiovascular health study.

*Neuroepidemiology*, 40(4), 274–281. <https://doi.org/10.1159/000345136>

MacDonald, S. W. S., DeCarlo, C. A., & Dixon, R. A. (2011). Linking biological and cognitive aging: toward improving characterizations of developmental time. *The Journals of Gerontology. Series B, Psychological Sciences and Social Sciences*, 66 Suppl 1, i59-70.

<https://doi.org/10.1093/geronb/gbr039>

MacDonald, S. W. S., Hultsch, D. F., & Dixon, R. A. (2011). Aging and the shape of cognitive change before death: Terminal decline or terminal drop? *The Journals of Gerontology: Series B: Psychological Sciences and Social Sciences*, 66B(3), 292–301.

<https://doi.org/10.1093/geronb/gbr001>

Mascherek, A., & Zimprich, D. (2011). Correlated change in memory complaints and memory performance across 12 years. *Psychology and Aging*, 26(4), 884–889.

<https://doi.org/10.1037/a0023156>

McEvoy, L. K., Laughlin, G. A., Barrett-Connor, E., Bergstrom, J., Kritz-Silverstein, D., Der-Martirosian, C., & von Mühlen, D. (2012). Metabolic syndrome and 16-year cognitive

decline in community-dwelling older adults. *Annals of Epidemiology*, 22(5), 310–317.

<https://doi.org/10.1016/j.annepidem.2011.12.003>

McFall, G. P., Wiebe, S. A., Vergote, D., Jhamandas, J., Westaway, D., & Dixon, R. A. (2014).

IDE (rs6583817) polymorphism and pulse pressure are independently and interactively associated with level and change in executive function in older adults. *Psychology and Aging*, 29(2), 418–430. <https://doi.org/10.1037/a0034656>

Mengel-From, J., Christensen, K., Thinggaard, M., McGue, M., & Christiansen, L. (2011).

Genetic variants in the choline acetyltransferase (chAT) gene are modestly associated with normal cognitive function in the elderly. *Genes, Brain & Behavior*, 10(8), 876–882.

<https://doi.org/10.1111/j.1601-183X.2011.00728.x>

Mengel-From, J., Thinggaard, M., Lindahl-Jacobsen, R., McGue, M., Christensen, K., &

Christiansen, L. (2013). CLU Genetic Variants and Cognitive Decline among Elderly and Oldest Old. *PLoS ONE*, 8(11). <https://doi.org/10.1371/journal.pone.0079105>

Mitchell, M. B., Cimino, C. R., Benitez, A., Brown, C. L., Gibbons, L. E., Kennison, R. F., ...

Piccinin, A. M. (2012). Cognitively Stimulating Activities: Effects on Cognition across Four Studies with up to 21 Years of Longitudinal Data. *Journal of Aging Research*, 2012, 461592. <https://doi.org/10.1155/2012/461592>

Muniz-Terrera, G., Matthews, F. E., Stephan, B., & Brayne, C. (2011). Are terminal decline and

its potential indicators detectable in population studies of the oldest old? *International Journal of Geriatric Psychiatry*, 26(6), 584–592. <https://doi.org/10.1002/gps.2566>

Nishita, Y., Tange, C., Tomida, M., Ando, F., & Shimokata, H. (2013). Does high educational

level protect against intellectual decline in older adults?: A 10-year longitudinal study. *Japanese Psychological Research*, 55(4), 378–389. <https://doi.org/10.1111/jpr.12028>

- Ossenkoppele, R., van der Flier, W. M., Verfaillie, S. C. J., Vrenken, H., Versteeg, A., van Schijndel, R. A., ... van Berckel, B. N. M. (2014). Long-term effects of amyloid, hypometabolism, and atrophy on neuropsychological functions. *Neurology*, 82(20), 1768–1775. <https://doi.org/10.1212/WNL.0000000000000432>
- Ottenbacher, A. J., Snih, S. A., Bindawas, S. M., Markides, K. S., Graham, J. E., Samper-Ternent, R., ... Ottenbacher, K. J. (2014). Role of physical activity in reducing cognitive decline in older Mexican-American adults. *Journal of the American Geriatrics Society*, 62(9), 1786–1791. <https://doi.org/10.1111/jgs.12978>
- Parisi, J. M., Gross, A. L., Rebok, G. W., Saczynski, J. S., Crowe, M., Cook, S. E., ... Unverzagt, F. W. (2011). Modeling change in memory performance and memory perceptions: Findings from the ACTIVE study. *Psychology and Aging*, 26(3), 518–524. <https://doi.org/10.1037/a0022458>
- Paulson, D., Bowen, M. E., & Lichtenberg, P. A. (2014). Does brain reserve protect older women from vascular depression? *The Journals of Gerontology. Series B, Psychological Sciences and Social Sciences*, 69(2), 157–167. <https://doi.org/10.1093/geronb/gbt007>
- Payne, B. R., Gross, A. L., Parisi, J. M., Sisco, S. M., Stine-Morrow, E. A. L., Marsiske, M., & Rebok, G. W. (2014). Modelling longitudinal changes in older adults' memory for spoken discourse: findings from the ACTIVE cohort. *Memory (Hove, England)*, 22(8), 990–1001. <https://doi.org/10.1080/09658211.2013.861916>
- Pearman, A., Hertzog, C., & Gerstorf, D. (2014). Little evidence for links between memory complaints and memory performance in very old age: Longitudinal analyses from the Berlin Aging Study. *Psychology and Aging*, 29(4), 828–842. <https://doi.org/10.1037/a0037141>

Peretz, C., Korczyn, A. D., Shatil, E., Aharonson, V., Birnboim, S., & Giladi, N. (2011).

Computer-based, personalized cognitive training versus classical computer games: a randomized double-blind prospective trial of cognitive stimulation. *Neuroepidemiology*, 36(2), 91–99. <https://doi.org/10.1159/000323950>

Petkus, A. J., Wetherell, J. L., Stein, M. B., Liu, L., & Barrett-Connor, E. (2012). History of sexual assault is associated with greater declines in executive functioning in older adults with APOE epsilon4. *The Journals of Gerontology. Series B, Psychological Sciences and Social Sciences*, 67(6), 653–659. <https://doi.org/10.1093/geronb/gbr163>

Piccinin, A. M., Muniz, G., Matthews, F. E., & Johansson, B. (2011). Terminal Decline From Within- and Between-Person Perspectives, Accounting for Incident Dementia. *The Journals of Gerontology Series B: Psychological Sciences and Social Sciences*, 66B(4), 391–401. <https://doi.org/10.1093/geronb/gbr010>

Power, M. C., Korrick, S., Tchetgen Tchetgen, E. J., Nie, L. H., Grodstein, F., Hu, H., ...

Weisskopf, M. G. (2014). Lead exposure and rate of change in cognitive function in older women. *Environmental Research*, 129, 69–75.

<https://doi.org/10.1016/j.envres.2013.12.010>

Praetorius, M., Thorvaldsson, V., Hassing, L. B., & Johansson, B. (2013). Substantial effects of apolipoprotein E ε4 on memory decline in very old age: longitudinal findings from a population-based sample. *Neurobiology of Aging*, 34(12), 2734–2739.

<https://doi.org/10.1016/j.neurobiolaging.2013.06.002>

Rabbitt, P., Lunn, M., Pendleton, N., & Yardefagar, G. (2011). Terminal pathologies affect rates of decline to different extents and age accelerates the effects of terminal pathology on

- cognitive decline. *The Journals of Gerontology. Series B, Psychological Sciences and Social Sciences*, 66(3), 325–334. <https://doi.org/10.1093/geronb/gbr026>
- Rajan, K. B., Aggarwal, N. T., Wilson, R. S., Everson-Rose, S. A., & Evans, D. A. (2014). Association of cognitive functioning, incident stroke, and mortality in older adults. *Stroke*, 45(9), 2563–2567. <https://doi.org/10.1161/STROKEAHA.114.005143>
- Ram, N., Gerstorf, D., Fauth, E., Zarit, S., & Malmberg, B. (2010). Aging, Disablement, and Dying: Using Time-as-Process and Time-as-Resources Metrics to Chart Late-Life Change. *Research in Human Development*, 7(1), 27–44. <https://doi.org/10.1080/15427600903578151>
- Rast, P. (2011). Verbal knowledge, working memory, and processing speed as predictors of verbal learning in older adults. *Developmental Psychology*, 47(5), 1490–1498. <https://doi.org/10.1037/a0023422>
- Riediger, M., Voelkle, M. C., Schaefer, S., & Lindenberger, U. (2014). Charting the life course: Age differences and validity of beliefs about lifespan development. *Psychology and Aging*, 29(3), 503–520. <https://doi.org/10.1037/a0036228>
- Rist, P. M., Dufouil, C., Glymour, M. M., Tzourio, C., & Kurth, T. (2011). Migraine and cognitive decline in the population-based EVA study. *Cephalalgia*, 31(12), 1291–1300. <https://doi.org/10.1177/0333102411417466>
- Ritchie, S. J., Tucker-Drob, E. M., & Deary, I. J. (2014). A strong link between speed of visual discrimination and cognitive ageing. *Current Biology*, 24(15), R681–R683. <https://doi.org/10.1016/j.cub.2014.06.012>
- Robitaille, A., Muniz, G., Piccinin, A. M., Johansson, B., & Hofer, S. M. (2012). Multivariate longitudinal modeling of cognitive aging: Associations among change and variation in



processing speed and visuospatial ability. *GeroPsych: The Journal of Gerontopsychology and Geriatric Psychiatry*, 25(1), 15–24. <https://doi.org/10.1024/1662-9647/a000051>

Rosano, C., Aizenstein, H. J., Newman, A. B., Venkatraman, V., Harris, T., Ding, J., ... Health ABC Study. (2012). Neuroimaging differences between older adults with maintained versus declining cognition over a 10-year period. *NeuroImage*, 62(1), 307–313. <https://doi.org/10.1016/j.neuroimage.2012.04.033>

Rosenberg, P. B., Mielke, M. M., Xue, Q.-L., & Carlson, M. C. (2010). Depressive symptoms predict incident cognitive impairment in cognitive healthy older women. *The American Journal of Geriatric Psychiatry*, 18(3), 204–211. <https://doi.org/10.1097/JGP.0b013e3181c53487>

Royall, D. R., Palmer, R., Chiodo, L. K., & Polk, M. J. (2012). Depressive symptoms predict longitudinal change in executive control but not memory. *International Journal of Geriatric Psychiatry*, 27(1), 89–96. <https://doi.org/10.1002/gps.2697>

Runge, S. K., Small, B. J., McFall, G. P., & Dixon, R. A. (2014). APOE moderates the association between lifestyle activities and cognitive performance: Evidence of genetic plasticity in aging. *Journal of the International Neuropsychological Society*, 20(5), 478–486. <https://doi.org/10.1017/S1355617714000356>

Sabia, S., Elbaz, A., Dugravot, A., Head, J., Shipley, M., Hagger-Johnson, G., ... Singh-Manoux, A. (2012). Impact of smoking on cognitive decline in early old age: the Whitehall II cohort study. *Archives of General Psychiatry*, 69(6), 627–635. <https://doi.org/10.1001/archgenpsychiatry.2011.2016>

Salthouse, T. A. (2014). Correlates of cognitive change. *Journal of Experimental Psychology: General*, 143(3), 1026–1048. <https://doi.org/10.1037/a0034847>

Sanders, A. E., Wang, C., Katz, M., Derby, C. A., Barzilai, N., Ozelius, L., & Lipton, R. B.

(2010). Association of a functional polymorphism in the cholesteryl ester transfer protein (CETP) gene with memory decline and incidence of dementia. *JAMA: Journal of the American Medical Association*, 303(2), 150–158. <https://doi.org/10.1001/jama.2009.1988>

Schiepers, O. J. G., Harris, S. E., Gow, A. J., Pattie, A., Brett, C. E., Starr, J. M., & Deary, I. J.

(2012). APOE E4 status predicts age-related cognitive decline in the ninth decade: Longitudinal follow-up of the Lothian Birth Cohort 1921. *Molecular Psychiatry*, 17(3), 315–324. <https://doi.org/10.1038/mp.2010.137>

Schiepers, O. J. G., van Boxtel, M. P. J., Harris, S. E., Gow, A. J., Pattie, A., Brett, C. E., ...

Deary, I. J. (2011). MTHFR polymorphisms and cognitive ageing in the ninth decade: the Lothian Birth Cohort 1921. *Genes, Brain, and Behavior*, 10(3), 354–364.

<https://doi.org/10.1111/j.1601-183X.2010.00675.x>

Schneider, J. A., Arvanitakis, Z., Yu, L., Boyle, P. A., Leurgans, S. E., & Bennett, D. A. (2012).

Cognitive impairment, decline and fluctuations in older community-dwelling subjects with Lewy bodies. *Brain: A Journal of Neurology*, 135(Pt 10), 3005–3014.

<https://doi.org/10.1093/brain/aws234>

Sharp, E. S., Reynolds, C. A., Pedersen, N. L., & Gatz, M. (2010). Cognitive engagement and

cognitive aging: is openness protective? *Psychology and Aging*, 25(1), 60–73.

<https://doi.org/10.1037/a0018748>

Shokouhi, S., Claassen, D., Kang, H., Ding, Z., Rogers, B., Mishra, A., ... Alzheimer's Disease

Neuroimaging Initiative. (2013). Longitudinal progression of cognitive decline correlates with changes in the spatial pattern of brain 18F-FDG PET. *Journal of Nuclear Medicine:*

*Official Publication, Society of Nuclear Medicine*, 54(9), 1564–1569.

<https://doi.org/10.2967/jnumed.112.116137>

Silbert, L. C., Dodge, H. H., Perkins, L. G., Sherbakov, L., Lahna, D., Erten-Lyons, D., ... Kaye, J. A. (2012). Trajectory of white matter hyperintensity burden preceding mild cognitive impairment. *Neurology*, 79(8), 741–747. <https://doi.org/10.1212/WNL.0b013e3182661f2b>

Small, B. J., Dixon, R. A., & McArdle, J. J. (2011). Tracking cognition-health changes from 55 to 95 years of age. *The Journals of Gerontology. Series B, Psychological Sciences and Social Sciences*, 66 Suppl 1, i153-161. <https://doi.org/10.1093/geronb/gbq093>

Snitz, B. E., Weissfeld, L. A., Lopez, O. L., Kuller, L. H., Saxton, J., Singhabahu, D. M., ... Dekosky, S. T. (2013). Cognitive trajectories associated with  $\beta$ -amyloid deposition in the oldest-old without dementia. *Neurology*, 80(15), 1378–1384.

<https://doi.org/10.1212/WNL.0b013e31828c2fc8>

Staff, R. T., Hogan, M. J., & Whalley, L. J. (2014). Aging trajectories of fluid intelligence in late life: The influence of age, practice and childhood IQ on Raven's Progressive Matrices. *Intelligence*, 47, 194–201. <https://doi.org/10.1016/j.intell.2014.09.013>

Stoykova, R., Matharan, F., Dartigues, J.-F., & Amieva, H. (2011). Impact of social network on cognitive performances and age-related cognitive decline across a 20-year follow-up. *International Psychogeriatrics*, 23(9), 1405–1412.

<https://doi.org/10.1017/S1041610211001165>

Tangney, C. C., Kwasny, M. J., Li, H., Wilson, R. S., Evans, D. A., & Morris, M. C. (2011). Adherence to a Mediterranean-type dietary pattern and cognitive decline in a community population. *The American Journal of Clinical Nutrition*, 93(3), 601–607.

<https://doi.org/10.3945/ajcn.110.007369>

Thomas, K. R., & Marsiske, M. (2014). Verbal prompting to improve everyday cognition in MCI and unimpaired older adults. *Neuropsychology*, 28(1), 123–134.

<https://doi.org/10.1037/neu0000039>

Thorvaldsson, V., Skoog, I., Hofer, S. M., Börjesson-Hanson, A., Östling, S., Sacuiu, S., & Johansson, B. (2012). Nonlinear blood pressure effects on cognition in old age: Separating between-person and within-person associations. *Psychology and Aging*, 27(2), 375–383.

<https://doi.org/10.1037/a0025631>

Toledo, J. B., Korff, A., Shaw, L. M., Trojanowski, J. Q., & Zhang, J. (2014). Low levels of cerebrospinal fluid complement 3 and factor H predict faster cognitive decline in mild cognitive impairment. *Alzheimer's Research & Therapy*, 6(3), 36.

<https://doi.org/10.1186/alzrt266>

Trompet, S., de Craen, A. J. M., Jukema, J. W., Pons, D., Slagboom, P. E., Kremer, D., ... Westendorp, R. G. J. (2011). Variation in the CBP gene involved in epigenetic control associates with cognitive function. *Neurobiology of Aging*, 32(3), 549.e1-8.

<https://doi.org/10.1016/j.neurobiolaging.2009.12.019>

Tucker-Drob, E. M. (2011). Global and domain-specific changes in cognition throughout adulthood. *Developmental Psychology*, 47(2), 331–343. <https://doi.org/10.1037/a0021361>

Tucker-Drob, E. M., Reynolds, C. A., Finkel, D., & Pedersen, N. L. (2014). Shared and unique genetic and environmental influences on aging-related changes in multiple cognitive abilities. *Developmental Psychology*, 50(1), 152–166. <https://doi.org/10.1037/a0032468>

van den Kommer, T. N., Dik, M. G., Comijs, H. C., Lütjohann, D., Lips, P., Jonker, C., & Deeg, D. J. H. (2012). The role of extracerebral cholesterol homeostasis and ApoE e4 in

cognitive decline. *Neurobiology of Aging*, 33(3), 622.e17-28.

<https://doi.org/10.1016/j.neurobiolaging.2011.02.019>

Van Gerven, P. W. M., Van Boxtel, M. P. J., Ausems, E. E. B., Bekers, O., & Jolles, J. (2012).

Do apolipoprotein E genotype and educational attainment predict the rate of cognitive decline in normal aging? A 12-year follow-up of the Maastricht Aging Study.

*Neuropsychology*, 26(4), 459–472. <https://doi.org/10.1037/a0028685>

Vannorsdall, T. D., Kueider, A. M., Carlson, M. C., & Schretlen, D. J. (2014). Higher baseline

serum uric acid is associated with poorer cognition but not rates of cognitive decline in women. *Experimental Gerontology*, 60, 136–139.

<https://doi.org/10.1016/j.exger.2014.10.013>

Velseboer, D. C., Broeders, M., Post, B., van Geloven, N., Speelman, J. D., Schmand, B., ...

CARPA Study Group. (2013). Prognostic factors of motor impairment, disability, and quality of life in newly diagnosed PD. *Neurology*, 80(7), 627–633.

<https://doi.org/10.1212/WNL.0b013e318281cc99>

Vemuri, P., Lesnick, T. G., Przybelski, S. A., Machulda, M., Knopman, D. S., Mielke, M. M., ...

Jack, C. R. J. (2014). Association of lifetime intellectual enrichment with cognitive decline in the older population. *JAMA Neurology*, 71(8), 1017–1024.

<https://doi.org/10.1001/jamaneurol.2014.963>

von Stumm, S., & Deary, I. J. (2012). Typical intellectual engagement and cognition in the ninth

decade of life: The Lothian Birth Cohort 1921. *Psychology and Aging*, 27(3), 761–767.

<https://doi.org/10.1037/a0026527>

- Vos, S. J., Xiong, C., Visser, P. J., Jasielec, M. S., Hassenstab, J., Grant, E. A., ... Fagan, A. M. (2013). Preclinical Alzheimer's disease and its outcome: a longitudinal cohort study. *The Lancet. Neurology*, 12(10), 957–965. [https://doi.org/10.1016/S1474-4422\(13\)70194-7](https://doi.org/10.1016/S1474-4422(13)70194-7)
- Wessels, A. M., Lane, K. A., Gao, S., Hall, K. S., Unverzagt, F. W., & Hendrie, H. C. (2011). Diabetes and cognitive decline in elderly African Americans: A 15-year follow-up study. *Alzheimer's & Dementia: The Journal of the Alzheimer's Association*, 7(4), 418–424. <https://doi.org/10.1016/j.jalz.2010.07.003>
- West, R. L., & Hastings, E. C. (2011). Self-regulation and recall: growth curve modeling of intervention outcomes for older adults. *Psychology and Aging*, 26(4), 803–812. <https://doi.org/10.1037/a0023784>
- Wilson, R. S., Aggarwal, N. T., Barnes, L. L., Mendes de Leon, C. F., Hebert, L. E., & Evans, D. A. (2010). Cognitive decline in incident Alzheimer disease in a community population. *Neurology*, 74(12), 951–955. <https://doi.org/10.1212/WNL.0b013e3181d64786>
- Wilson, R. S., Boyle, P. A., Yu, L., Barnes, L. L., Schneider, J. A., & Bennett, D. A. (2013). Life-span cognitive activity, neuropathologic burden, and cognitive aging. *Neurology*, 81(4), 314–321. <https://doi.org/10.1212/WNL.0b013e31829c5e8a>
- Wilson, R. S., Hebert, L. E., Scherr, P. A., Dong, X., Leurgens, S. E., & Evans, D. A. (2012). Cognitive decline after hospitalization in a community population of older persons. *Neurology*, 78(13), 950–956. <https://doi.org/10.1212/WNL.0b013e31824d5894>
- Wilson, R. S., Segawa, E., Hize, L. P., Boyle, P. A., & Bennett, D. A. (2012). Terminal dedifferentiation of cognitive abilities. *Neurology*, 78(15), 1116–1122. <https://doi.org/10.1212/WNL.0b013e31824f7ff2>

- Yaffe, K., Falvey, C., Hamilton, N., Schwartz, A. V., Simonsick, E. M., Satterfield, S., ... Harris, T. B. (2012). Diabetes, glucose control, and 9-year cognitive decline among older adults without dementia. *Archives of Neurology*, 69(9), 1170–1175.  
<https://doi.org/10.1001/archneurol.2012.1117>
- Zahodne, L. B., Schofield, P. W., Farrell, M. T., Stern, Y., & Manly, J. J. (2014). Bilingualism does not alter cognitive decline or dementia risk among Spanish-speaking immigrants. *Neuropsychology*, 28(2), 238–246. <https://doi.org/10.1037/neu0000014>
- Zeki Al Hazzouri, A., Haan, M. N., Osypuk, T., Abdou, C., Hinton, L., & Aiello, A. E. (2011). Neighborhood socioeconomic context and cognitive decline among older Mexican Americans: results from the Sacramento Area Latino Study on Aging. *American Journal of Epidemiology*, 174(4), 423–431. <https://doi.org/10.1093/aje/kwr095>
- Zeki Al Hazzouri, A., Newman, A. B., Simonsick, E., Sink, K. M., Sutton Tyrrell, K., Watson, N., ... Health ABC Study. (2013). Pulse wave velocity and cognitive decline in elders: the Health, Aging, and Body Composition study. *Stroke*, 44(2), 388–393.  
<https://doi.org/10.1161/STROKEAHA.112.673533>
- Zhang, C., & Pierce, B. L. (2014). Genetic susceptibility to accelerated cognitive decline in the US health and retirement study. *Neurobiology of Aging*, 35(6), e11–e18.  
<https://doi.org/10.1016/j.neurobiolaging.2013.12.021>
- Zheng, L., Mack, W. J., Chui, H. C., Heflin, L., Mungas, D., Reed, B., ... Kramer, J. H. (2012). Coronary artery disease is associated with cognitive decline independent of changes on magnetic resonance imaging in cognitively normal elderly adults. *Journal of the American Geriatrics Society*, 60(3), 499–504. <https://doi.org/10.1111/j.1532-5415.2011.03839.x>

### **Supplementary Appendix 3**

#### **Detailed results of literature review**

The literature search produced 1253 records, and after exclusion of duplicate and irrelevant records, we fully analyzed 162 records. See Supplementary Appendix 1 and Supplementary Figure 1 for full details.

Of the 162 records, the data were of panel type for 156 records, and experimental for six.

The number of repeated measurements ranged from 2 to 20, with a mean of 5.071 (median = 5, s.d. = 2.895, interquartile range = 3 to 6; information not available for nine records).

Multilevel/mixed effects type models were used in 135 records (one with a penalized linear spline; one with a thin plate regression spline; one was nonlinear in the parameters; one was a generalized mixed-effects model), whereas a latent curve type model was used in 26 records (three analyzed multiple variables in parallel; one was a 2<sup>nd</sup> level curve model; two used a structured latent curve model). Finally, the remaining record applied both models.

One hundred and two records (63%) tested only a linear change function, and of these only one had experimental data, whereas the remaining 101 were panel studies. Moreover, the number of occasions ranged from 2 to 17 (median = 4.000, mean = 4.792, s.d. = 2.927). Forty (25%) studies tested also a quadratic function, and of these all were panel studies, with between 2 and 12 occasions (median = 5.000, mean = 5.351, s.d. = 2.163). One study tested a cubic function, and this study was a panel with five occasions.



Thirteen (8%) records tested a broken-stick function (a.k.a. single-node spline; ten of which compared it to a linear or quadratic function). These were all panel studies, with between 3 and 6 occasions (median = mean = 5.000, s.d. = 1.265).

Of the remaining records, five (3%) tested an exponential function (all with experimental data, with from 5 to 20 occasions, median=8.000, mean = 9.800, s.d. = 6.017), two (1%) estimated the change function from the data (within a latent curve model; both were panel studies, with either 3 or 4 occasions), one used a multiple-node spline approach (a panel study with 7 occasions), and one did not specify the change function (a panel study with 6 occasions). Overall, of the eight records that tested a nonlinear function, five were on experimental data, with number of occasions ranging from 5 to 20 (median = 8.000, mean = 9.800, s.d. = 6.017); all used occasions of measurement as the time basis; all applied an exponential function, and one also estimated the change function within a latent curve model.

Across all studies, the most frequent time bases were time in study ( $n = 76$ ), occasions of measurement ( $n = 41$ ), chronological age ( $n = 33$ ), and time to event ( $n = 13$ ; e.g., death, dementia, stroke, hospitalization). One record used a time-varying medical covariate as basis, and three records did not provide this information. Finally, five records used and compared two of the aforementioned bases.

### Supplementary Appendix 4

#### Logistic regression to study the determinants of an acceptable solution

To understand which design feature most strongly influences the probability of obtaining an acceptable solution, we computed a logistic regression analysis. The dichotomous variable was AS vs. non-AS, and the predictors were model type, GCR,  $T$ ,  $\Delta$ , and  $N$ . We computed this analysis for the shallower exponential decline rate only ( $\gamma = 0.033$ ), given the very high number of AS for  $\gamma = 0.066$ . For simplicity, we present the analyses including all main effects only (all interactions proved irrelevant). Below we display the type-III likelihood ratio tests concerning each simulation factor, with its degrees of freedom and  $p$ -value, and the drop in effect size measures when each simulation factor is omitted from the logistic equation. The strongest effect was by far associated to the model type, while all other factors were associated to much weaker effect sizes.

| Factor (df)   | LRT         | $\sim R^2 CS$ | $\sim R^2 N$ |
|---------------|-------------|---------------|--------------|
| model (3)     | 5490.772    | .126          | .249         |
| GCR (2)       | 1921.237    | .042          | .083         |
| $T$ (1)       | 1845.481    | .040          | .079         |
| $\Delta$ (4)  | 1239.208    | .027          | .053         |
| $N$ (2)       | 225.037     | .005          | .009         |
| $\sim R^2 CS$ | .232 (.269) |               |              |
| $\sim R^2 N$  | .457 (.529) |               |              |

*Note.* LRT=Type-III likelihood ratio tests associated to each simulation factor and design feature (rows) in a logistic regression predicting the probability of obtaining an acceptable solution (the associated degrees of freedom are in parenthesis; all  $p$ -values are  $<.001$ ).  $\sim R^2_{CS}$  and  $\sim R^2_N$  = drop in pseudo  $R^2$  of Cox and Snell and pseudo  $R^2$  of Nagelkerke, respectively, when that effect is removed from the regression equation. The lower panel presents the total effect size indexes of pseudo  $R^2$  of Cox and Snell (tot.  $R^2_{CS}$ ) and of Nagelkerke (tot.  $R^2_N$ ) with only the main effects, and in parentheses the analogous estimates with the addition of all interactions.

**Supplementary Appendix 5**

**Summary of results of analyses on rejections of the linear GM and the quadratic GM when compared to the exponential GM and of the linear GM when compared to the quadratic GM for  $\gamma = 0.033$  only (based on difference in BIC greater than 10)**

| Factor (df)            | Linear vs. Exponential |                   |                  | Quadratic vs. Exponential |                   |                  | Linear vs. Quadratic |                   |                  |
|------------------------|------------------------|-------------------|------------------|---------------------------|-------------------|------------------|----------------------|-------------------|------------------|
|                        | LRT                    | R <sup>2</sup> CS | R <sup>2</sup> N | LRT                       | R <sup>2</sup> CS | R <sup>2</sup> N | LRT                  | R <sup>2</sup> CS | R <sup>2</sup> N |
| GCR (2)                | 1575.403               | .112              | .159             | 830.301                   | .084              | .113             | 991.222              | .196              | .307             |
| <i>T</i> (1)           | 2443.488               | .185              | .261             | 1324.233                  | .140              | .187             | 2096.576             | .251              | .382             |
| $\Delta$ (4)           | 2503.807               | .190              | .269             | 1236.640                  | .130              | .173             | 2171.507             | .208              | .296             |
| <i>N</i> (2)           | 1200.185               | .083              | .118             | 288.879                   | .028              | .037             | 870.941              | .139              | .232             |
| tot. R <sup>2</sup> CS | .511 (.539)            |                   |                  | .403 (.547)               |                   |                  | .514 (.538)          |                   |                  |
| tot. R <sup>2</sup> N  | .723 (.763)            |                   |                  | .538 (.730)               |                   |                  | .733 (.766)          |                   |                  |

*Note.* LRT=Type-III likelihood ratio tests associated to each simulation factor and design feature (rows) for the linear vs. exponential (columns 2-4), quadratic vs. exponential (columns 5-7), and linear vs. quadratic (columns 8-10) GMs in logistic regressions predicting the probability of rejecting the linear or quadratic GM when compared to the exponential GM or the linear GM when compared to the quadratic GM (the associated degrees of freedom are next to the name of each term; all *p*-values are < .001). R<sup>2</sup>CS and R<sup>2</sup>N = drop in pseudo R<sup>2</sup> of Cox and Snell and pseudo R<sup>2</sup> of Nagelkerke, respectively, when that effect is removed from the regression equation. The lower panel presents the total effect size indexes of pseudo R<sup>2</sup> of Cox and Snell (tot. R<sup>2</sup> CS) and of Nagelkerke (tot. R<sup>2</sup> N) with only the main effects, and in parentheses the analogous estimates with the addition of all interactions.

### Supplementary Appendix 6

#### Summary of Results of Analyses on Power to Detect Change Variance for $\gamma = 0.033$

Because the true variance in change ( $\sigma^2_C$ ) is at a boundary (i.e., cannot be negative), we used a 50:50 mixture of a 1- and 2-degree-of-freedom chi square distribution (Self & Liang, 1987; Stoel, Garre, Dolan, & van den Wittenboer, 2006) to compute all likelihood ratio tests. However, given the reservations raised by some about this methodology (e.g., Savalei & Kolenikov, 2008), we also applied a 2-degree-of-freedom test. The results were identical.

|                          | Linear      |                   |                  | Quadratic   |                   |                  | Exponential |                   |                  |
|--------------------------|-------------|-------------------|------------------|-------------|-------------------|------------------|-------------|-------------------|------------------|
| Factor (df)              | LRT         | R <sup>2</sup> CS | R <sup>2</sup> N | LRT         | R <sup>2</sup> CS | R <sup>2</sup> N | LRT         | R <sup>2</sup> CS | R <sup>2</sup> N |
| GCR (2)                  | 248.320     | .024              | .043             | 493.457     | .058              | .096             | 546.575     | .047              | .077             |
| <i>T</i> (1)             | 702.835     | .071              | .125             | 725.443     | .087              | .143             | 741.567     | .065              | .106             |
| $\Delta$ (4)             | 932.453     | .096              | .168             | 993.848     | .122              | .200             | 1192.894    | .107              | .176             |
| <i>N</i> (2)             | 660.821     | .067              | .117             | 279.642     | .032              | .053             | 901.961     | .079              | .131             |
| total ~R <sup>2</sup> CS | .241 (.272) |                   |                  | .272 (.318) |                   |                  | .282 (.317) |                   |                  |
| total ~R <sup>2</sup> N  | .422 (.477) |                   |                  | .448 (.524) |                   |                  | .464 (.522) |                   |                  |

*Note.* Type-III likelihood ratio tests associated to each simulation factor and design feature (rows) for the linear (columns 2-4), quadratic (column 5-7), and exponential (column 8-10) GMs in logistic regressions predicting the probability of rejecting the alternative models in which  $\sigma^2_C = \sigma_{LC} = 0$  (the associated degrees of freedom are next to the name of each term; all *p*-values are <.001). R<sup>2</sup>CS and R<sup>2</sup>N = drop in pseudo R<sup>2</sup> of Cox and Snell and pseudo R<sup>2</sup> of Nagelkerke, respectively, when that effect is removed from the regression equation. The lower panel presents the total effect size indexes of pseudo R<sup>2</sup> of Cox and Snell (total ~R<sup>2</sup> CS) and of Nagelkerke (total ~R<sup>2</sup> N) with only the main effects, and in parentheses the analogous estimates with the addition of all interactions.

### ***References***

- Self, G. S., & Liang, K.-Y. (1987). Asymptotic properties of maximum likelihood estimators and likelihood ratio tests under nonstandard conditions. *Journal of the American Statistical Association*, 82, 605–610. <https://doi.org/10.2307/2289471>
- Stoel, R. D., Garre, F. G., Dolan, C., & van den Wittenboer, G. (2006). On the likelihood ratio test in structural equation modeling when parameters are subject to boundary constraints. *Psychological Methods*, 11(4), 439–455. <https://doi.org/10.1037/1082-989X.11.4.439>
- Savalei, V., & Kolenikov, S. (2008). Constrained versus unconstrained estimation in structural equation modeling. *Psychological Methods*, 13(2), 150–170. <https://doi.org/10.1037/1082-989X.13.2.150>

**Supplementary Table 1**

**Number of records from each literature database for each combined use of statistical and substantive search terms**

| Search terms                                         |                | Database |     |    |     |
|------------------------------------------------------|----------------|----------|-----|----|-----|
| Statistical                                          | Substantive    | WoS      | PI  | PM | all |
| “Growth curve model*”                                | “cogniti*”     | 164      | 128 | 16 | 308 |
| “Growth curve model*”                                | “intelligence” | 22       | 34  | 4  | 60  |
| “Latent curve model*”                                | “cogniti*”     | 7        | 5   | 0  | 12  |
| “Latent curve model*”                                | “intelligence” | 2        | 2   | 0  | 4   |
| “multilevel model*” and “longitudinal”               | “cogniti*”     | 74       | 74  | 1  | 149 |
| “multilevel model*” and “longitudinal”               | “intelligence” | 12       | 30  | 1  | 43  |
| “mixed effects model*” and “longitudinal”            | “cogniti*”     | 104      | 84  | 26 | 214 |
| “mixed effects model*” and “longitudinal”            | “intelligence” | 7        | 16  | 2  | 25  |
| “linear mixed model*” and “longitudinal”             | “cogniti*”     | 98       | 79  | 23 | 200 |
| “linear mixed model*” and “longitudinal”             | “intelligence” | 6        | 17  | 2  | 25  |
| “random effects model*” and “longitudinal”           | “cogniti*”     | 40       | 19  | 9  | 68  |
| “random effects model*” and “longitudinal”           | “intelligence” | 0        | 2   | 0  | 2   |
| “hierarchical linear model*” and “longitudinal”      | “cogniti*”     | 48       | 52  | 4  | 104 |
| “hierarchical linear model*” and “longitudinal”      | “intelligence” | 3        | 13  | 0  | 16  |
| “nonlinear hierarchical model*” and “longitudinal”   | “cogniti*”     | 0        | 0   | 0  | 0   |
| “nonlinear hierarchical model*” and “longitudinal”   | “intelligence” | 0        | 0   | 0  | 0   |
| “generalized linear mixed model*” and “longitudinal” | “cogniti*”     | 5        | 13  | 1  | 19  |

|                                                      |                |     |            |    |      |
|------------------------------------------------------|----------------|-----|------------|----|------|
| “generalized linear mixed model*” and “longitudinal” | “intelligence” | 0   | 3          | 0  | 3    |
| “nonlinear mixed model*” and “longitudinal”          | “cogniti*”     | 1   | 0          | 0  | 1    |
| “nonlinear mixed model*” and “longitudinal”          | “intelligence” | 0   | 0          | 0  | 0    |
| Sum                                                  |                | 593 | 571        | 89 | 1253 |
| Records without intra-base duplicates                |                | 536 | 493        | 82 | 1111 |
| Records without inter-bases duplicates               |                |     | 719        |    |      |
| <b>Records retained for full lecture</b>             |                |     | <b>162</b> |    |      |

*Notes.* WoS=Web of Science; PI=PsycINFO; PM=PubMed.



**Supplementary Table 2****Parameter Estimates (and Standard Errors) of the Linear, Quadratic, and Exponential GM applied to the Recall Score in the Betula Study.**

| parameter                   | level GM       | linear GM             | quadratic GM          | exponential GM          |
|-----------------------------|----------------|-----------------------|-----------------------|-------------------------|
| $\beta_0$                   | 23.521 (0.251) | 23.506 (0.214)        | 24.615 (0.218)        | 20.603 (0.439)          |
| $\beta_1$                   | --             | -0.254 (0.012)        | -0.341 (0.013)        | -4.007 (0.451)          |
| $\beta_2$                   | --             | --                    | -0.009 (<0.001)       | --                      |
| $\gamma$                    | --             | --                    | --                    | 0.066 (0.004)           |
| $\sigma^2_L$                | 55.518 (2.840) | 33.758 (2.246)        | 30.779 (1.983)        | 30.980 (2.786)          |
| $\sigma^2_C$                | --             | 0.032 (0.007)         | 0.027 (0.006)         | 5.041 (1.402)           |
| $\sigma_{L,C} [\rho_{L,C}]$ | --             | 0.638 (0.086) [0.619] | 0.379 (0.072) [0.413] | -3.163 (1.599) [-0.253] |
| $\sigma^2_E$                | 18.148 (0.576) | 16.444 (0.597)        | 14.942 (0.541)        | 14.541 (0.526)          |
| $-2LL$                      | 19'453         | 18'911                | 18'692                | 18'686                  |
| $BIC$                       | 19'473         | 18'952                | 18'741                | 18'734                  |
| $p$                         | 3              | 6                     | 7                     | 7                       |

*Note.* GM=growth model.  $\rho_{L,C}$  = correlation between level and change.  $p$  = number of estimated parameters. All models were estimated with age centered at 65 years. Standard errors are in parentheses. For the quadratic model and the exponential model it was not possible to estimate the variance, respectively, of the quadratic slope and of the exponential decline rate.

**Supplementary Table 3****Factors in Simulation Study**

|                                                                                            |                  |
|--------------------------------------------------------------------------------------------|------------------|
| Constant Simulation Factors                                                                |                  |
| Level mean ( $\beta_0$ )                                                                   | 20.603           |
| Change mean ( $\beta_1$ )                                                                  | -4.007           |
| Level variance ( $\sigma_L^2$ )                                                            | 30.980           |
| Change variance ( $\sigma_C^2$ )                                                           | 5.041            |
| Level-change covariance ( $\sigma_{L,C}$ )                                                 | -3.163           |
| Varying Simulation Factors                                                                 |                  |
| Rate of exponential decline ( $\gamma$ )                                                   | 0.033, 0.066     |
| Growth Curve Reliability $\left( GCR = \frac{\sigma_L^2}{\sigma_L^2 + \sigma_E^2} \right)$ | .500, .681, .900 |
| Varying Design Factors                                                                     |                  |
| Occasions ( $T$ )                                                                          | 3, 6             |
| Interval ( $\Delta$ )                                                                      | 1, 2, 3, 4, 5    |
| Total sample size ( $N$ )                                                                  | 500, 1000, 2000  |

*Note.* The factors refer to the exponential decline function (Equation (4)). The full design includes 5 fully crossed varying factors ( $\gamma$ , GCR,  $T$ ,  $\Delta$ ,  $N$ ) for a total of  $2 \times 3 \times 2 \times 5 \times 3 = 180$  conditions. On each condition 4 growth models were tested (level, linear, quadratic and exponential) and each condition contained 100 replications. In the end, we obtained  $180 \times 4 \times 100 = 72000$  sets of solutions.

## Supplementary Figure 1

### Flowchart with screening procedure of articles included in the quantitative analysis

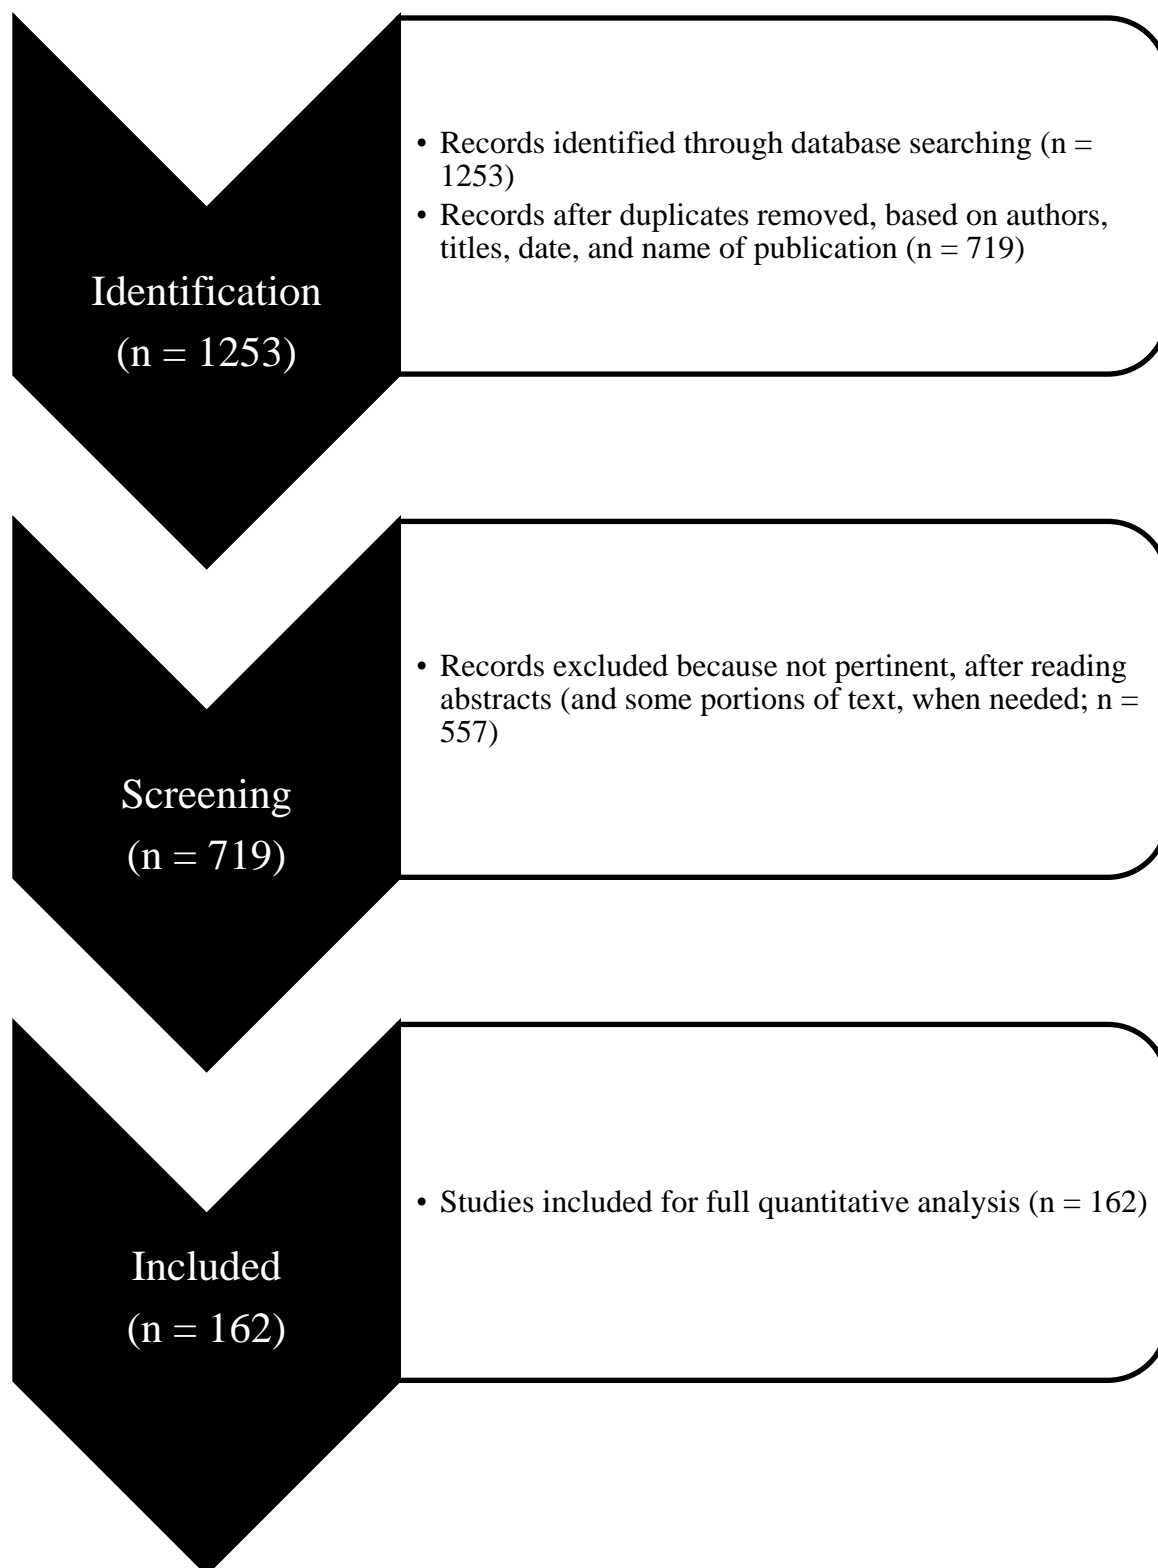

**Supplementary Figure 2****Betula recall scores by age**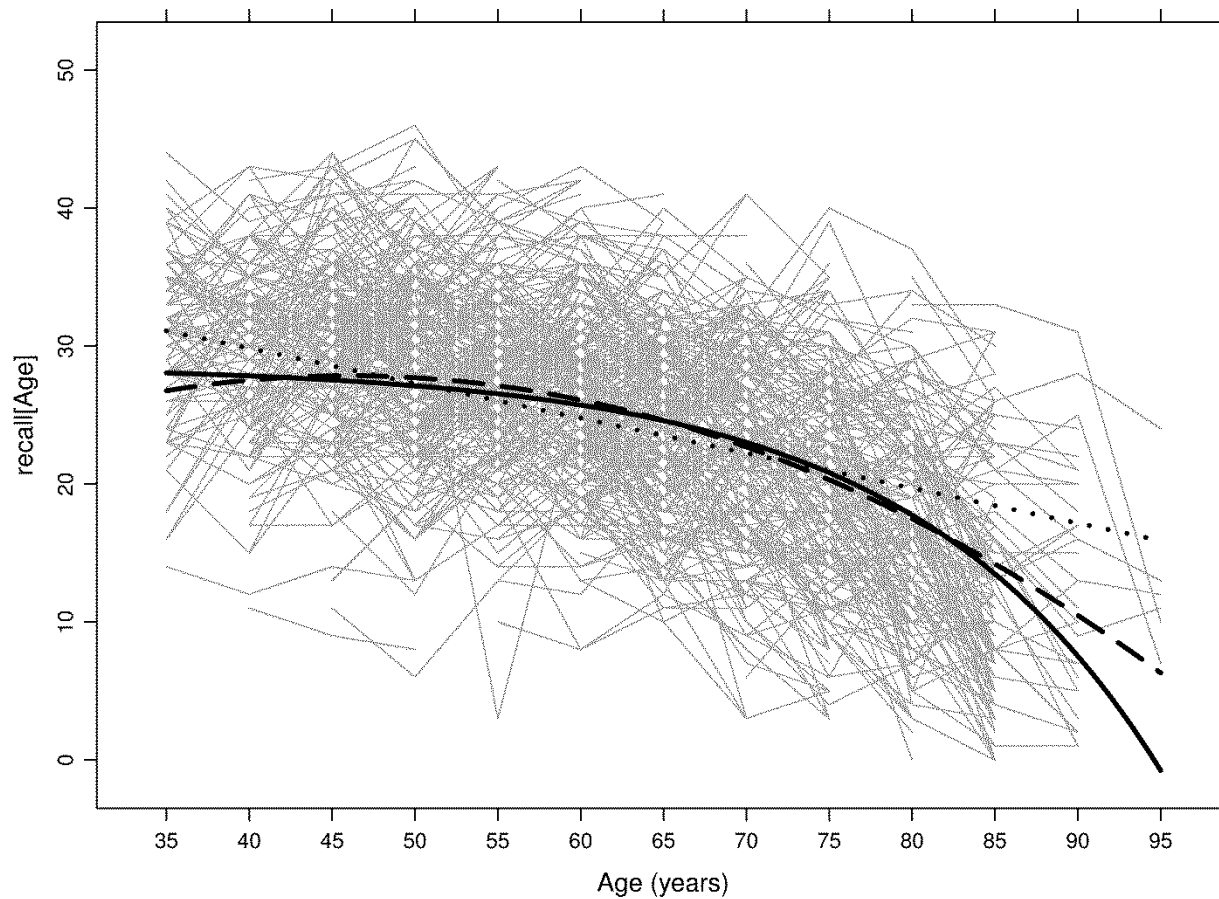

*Note.* The sample predicted trajectory is represented by the black dotted line for the linear GM, the black dashed line for the quadratic GM, and the continuous black line for the exponential decline GM. The grey lines represent the observed individual trajectories ( $N = 1000$ ).

### Supplementary Figure 3

Average number of acceptable solutions by interval width for  $\gamma = 0.033$ , separately for each model

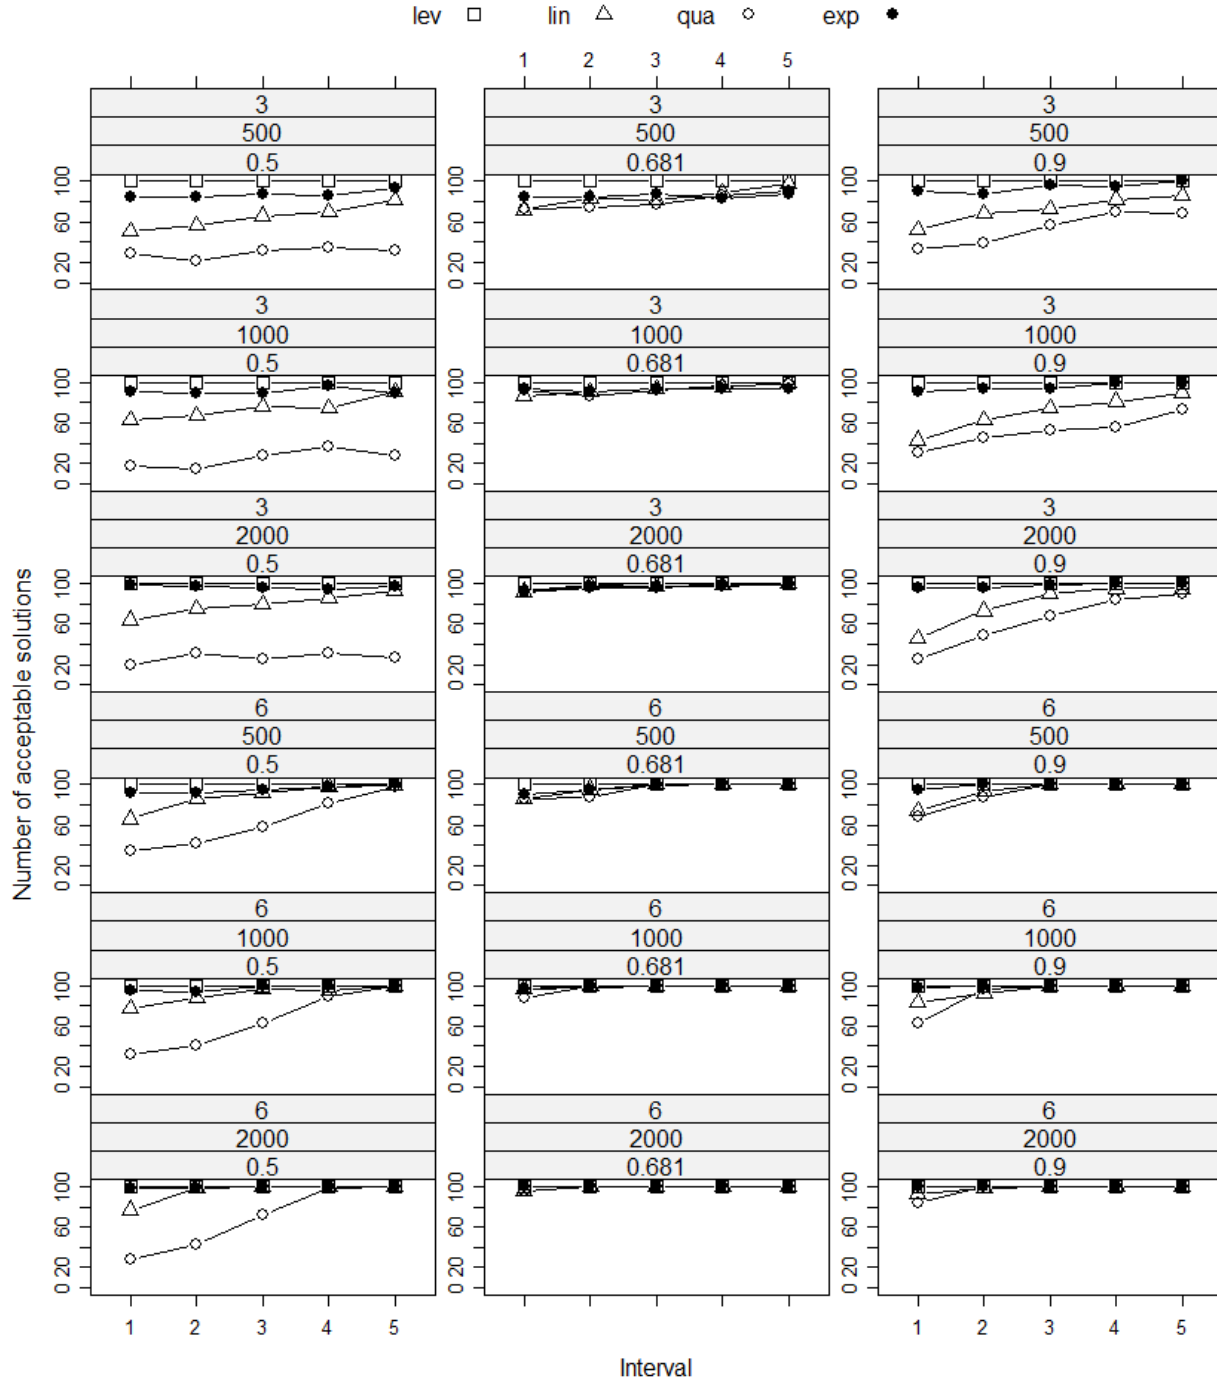

*Note.* Rows 1, 2, 3:  $T = 3$ , rows 4, 5, 6:  $T = 6$ ; Rows 1, 4:  $N = 500$ , rows 2, 5:  $N = 1000$ , rows 3, 6:  $N = 2000$ ; Column 1:  $GCR = .500$ , column 2:  $GCR = .681$ , column 3:  $GCR = .900$ .

# **Supplementary Figure 4**

**Proportions of rejection of the linear GM and the quadratic GM when compared to the exponential GM and of the linear GM when compared to the quadratic GM (based on difference in BIC greater than 10) as a function of interval width for  $\gamma = 0.033$  only**

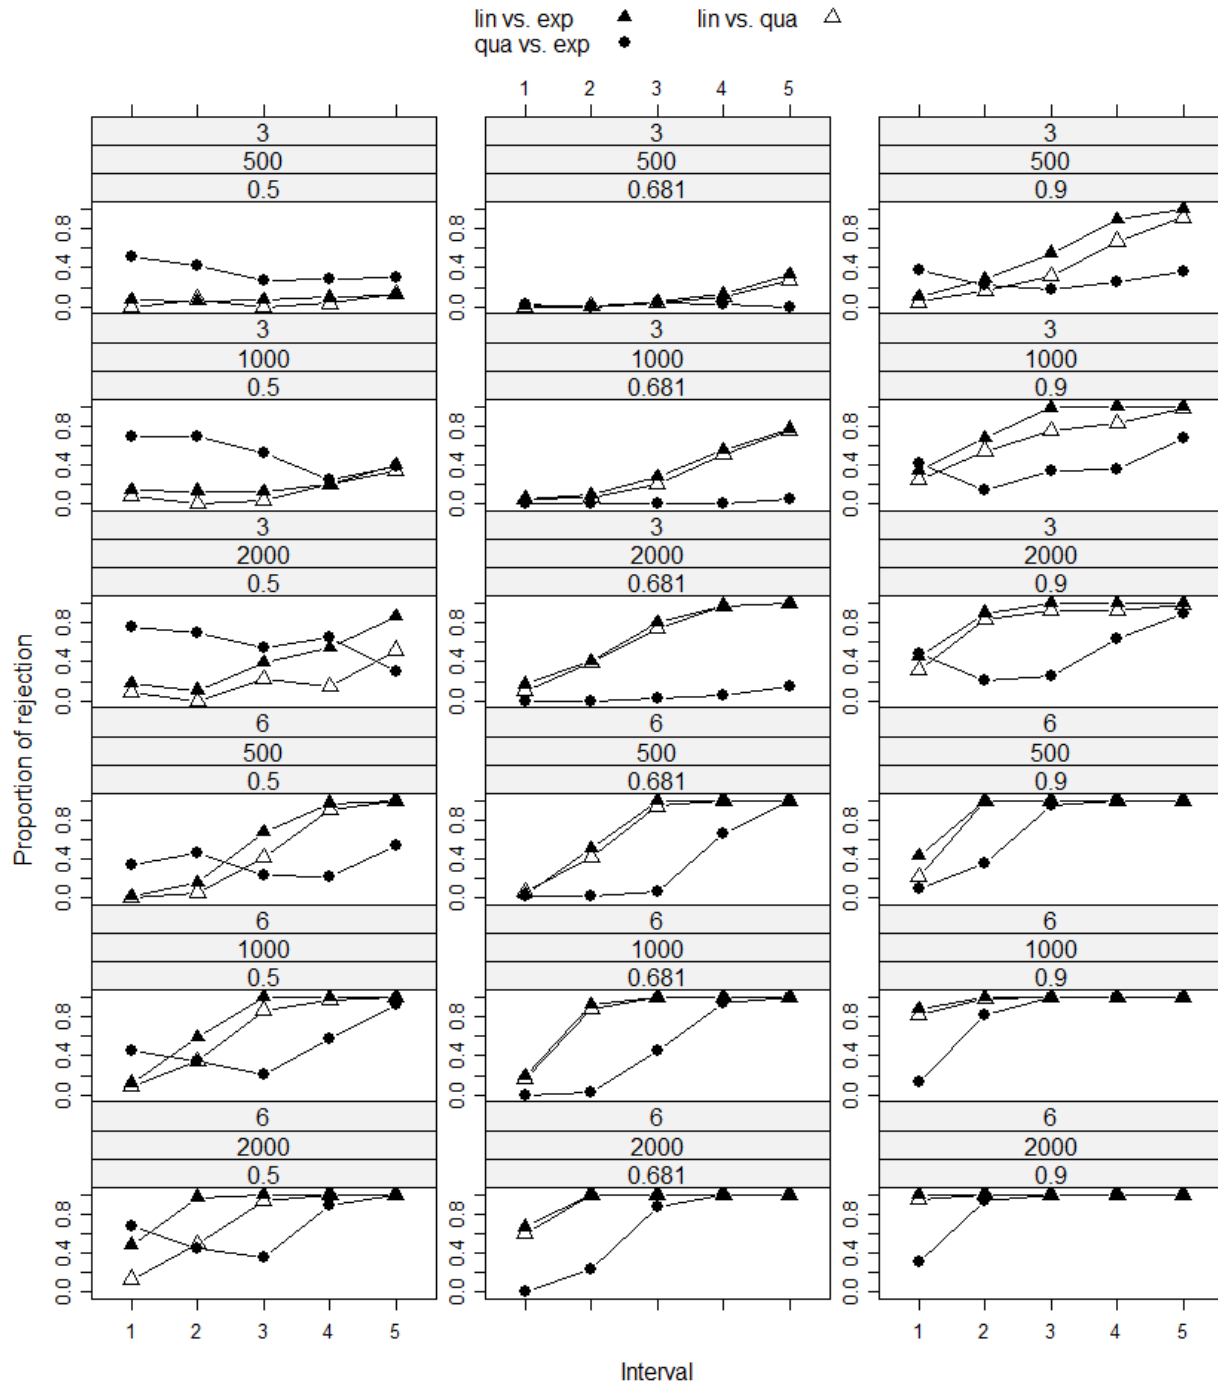

*Note.* Rows 1, 2, 3:  $T = 3$ , rows 4, 5, 6:  $T = 6$ ; Rows 1, 4:  $N = 500$ , rows 2, 5:  $N = 1000$ , rows 3, 6:  $N = 2000$ ; Column 1:  $GCR = .500$ , column 2:  $GCR = .681$ , column 3:  $GCR = .900$ .

# Supplementary Figure 5

Power to Detect Variance in Change by Interval Width for  $\gamma = 0.033$ , for each Model

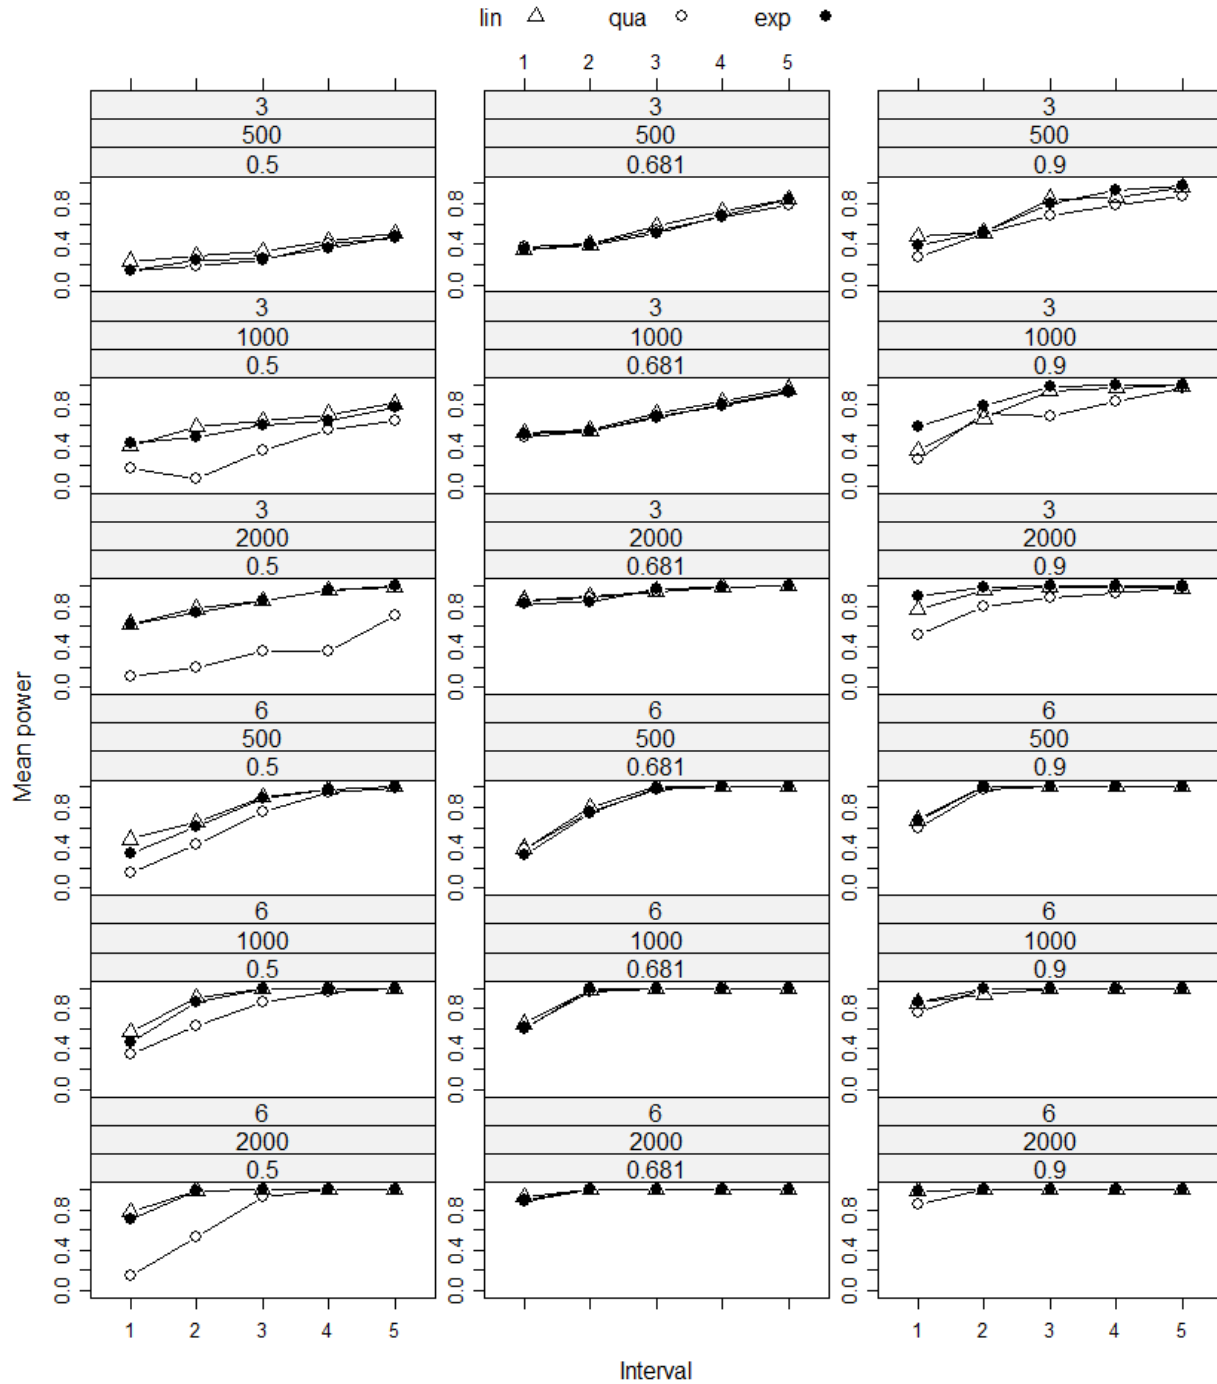

*Note.* Rows 1, 2, 3:  $T = 3$ , rows 4, 5, 6:  $T = 6$ ; Rows 1, 4:  $N = 500$ , rows 2, 5:  $N = 1000$ , rows 3, 6:  $N = 2000$ ; Column 1:  $GCR = .500$ , column 2:  $GCR = .681$ , column 3:  $GCR = .900$ .
